# Supplementary material for: Olefin metathesis in carotenoid synthesis
Source: Royal Society of Chemistry journal article supplement (doi:10.1039/b915390j), 2009-01-01
Supplement: b915390j.pdf [file b915390j.pdf]

**General.** All commercially available reagents were used without further purification. All solvents were used after distillation. Tetrahydrofuran (THF), diethyl ether and toluene were refluxed over and distilled from sodium-benzophenone ketyl. Dichloromethane was refluxed over and distilled from P<sub>2</sub>O<sub>5</sub>. Dimethylformamide (DMF) was distilled from CaH<sub>2</sub> under reduced pressure. Preparative separation was performed by column chromatography on silica gel. <sup>1</sup>H NMR and <sup>13</sup>C NMR spectra were recorded on a 400MHz spectrometer and chemical shifts were represented as δ-values relative to the internal standard TMS. IR spectra were recorded on a FT-IR Spectrometer. High-resolution mass spectra (HRMS) were measured on a ESI-TOF MS.

**(trans)-2-[(1S,2R,4S)-4-Hydroxy-1,2-epoxy-2,6,6-trimethylcyclohexyl]-1-iodoethylene (9).**

To a solution of iodine (1.28 g, 5.04 mmol), Na<sub>2</sub>CO<sub>3</sub> (1.07 g, 10.1 mmol) in dichloromethane (25.2 mL) was added dropwise a solution of stannane **8** (1.19 g, 2.52 mmol) in dichloromethane (3 mL) at 0 °C. After being stirred for 15 min at 0 °C, the mixture was poured into a saturated aqueous Na<sub>2</sub>S<sub>2</sub>O<sub>3</sub> solution, and then extracted with ethyl acetate. The organic layers were combined, washed with brine, dried over MgSO<sub>4</sub>, filtered and concentrated *in vacuo*. Purification by silica gel column chromatography (from 10% to 50% ethyl acetate in hexane) afforded iodide **9** (764 mg, 98%) as a colorless oil: [α]<sub>D</sub><sup>23</sup> -82.0 (c 0.99, CHCl<sub>3</sub>); IR (KBr disk, cm<sup>-1</sup>) 3449, 2963, 2870, 1695, 1466, 1303, 1184, 1122, 1047, 953, 914; <sup>1</sup>H NMR (CDCl<sub>3</sub>, 400 MHz) δ 6.75 (d, *J* = 14.2 Hz, 1H), 6.25 (d, *J* = 14.2, 1H), 3.85 (m, 1H), 2.34 (ddd, *J* = 14.7, 5.0, 1.8 Hz, 1H), 1.60 (m, 2H), 1.21 (dd, *J* = 11.9, 11.9 Hz, 1H), 1.21 (s, 3H), 1.14 (s, 3H), 0.97 (s, 3H); <sup>13</sup>C NMR (CDCl<sub>3</sub>, 100 MHz) δ 142.1, 79.7, 72.7, 66.6, 64.3, 47.1, 40.9, 35.1, 29.6, 25.0, 20.2.

**(2E,4E)-5-[(1'S,2'R,4'S)-4'-Hydroxy-1',2'-epoxy-2',6',6'-trimethylcyclohexa-1'-yl]-3-methylpenta-2,4-diene-1-ol (11).** To a solution of vinyl iodide **9** (71 mg, 0.23 mmol) and stannane **10** (208 mg, 0.58 mmol) in DMF (1.15 mL) was added bis(acetonitrile)dichloropalladium(II) (3 mg, 0.012 mmol) and lithium chloride (19 mg, 0.46 mmol). After being stirred for 20 min at room temperature, the reaction mixture was poured into water, and then extracted with ethyl acetate. The organic layers were combined, washed with brine, dried over MgSO<sub>4</sub>, filtered and concentrated *in vacuo*. Purification by silica gel column chromatography (from 30% to 60% ethyl acetate in hexane) afforded alcohol **11** (50 mg, 86%) as a white solid: [α]<sub>D</sub><sup>25</sup> -62.9 (c 1.14, MeOH); IR (KBr disk, cm<sup>-1</sup>) 3449, 2963, 2870, 1695,

1466, 1303, 1184, 1122, 1047, 953, 914;  $^1\text{H}$  NMR ( $\text{CDCl}_3$ , 400 MHz)  $\delta$  6.20 (d,  $J = 15.6$  Hz, 1H), 5.85 (d,  $J = 15.6$ , 1H), 5.65 (t,  $J = 6.9$  Hz, 1H), 4.26 (d,  $J = 6.4$  Hz, 2H), 3.86 (m, 1H), 2.34 (ddd,  $J = 14.2, 3.2, 1.9$  Hz, 1H), 1.78 (s, 3H), 1.58 (m, 2H), 1.21 (dd,  $J = 12.9, 10.6$  Hz, 1H), 1.15 (s, 3H), 1.11 (s, 3H), 0.94 (s, 3H);  $^{13}\text{C}$  NMR ( $\text{CDCl}_3$ , 100 MHz)  $\delta$  137.0, 135.6, 130.6, 124.8, 70.4, 67.1, 64.5, 59.6, 47.4, 41.2, 35.5, 29.9, 25.1, 20.2, 13.0; ESI-HRMS  $m/z$  calcd for  $\text{C}_{15}\text{H}_{24}\text{O}_3\text{Na}$  ( $\text{M}+\text{Na}$ ) $^+$  275.1623, found 275.1610.

**(3E,5E)-6-[(1'S,2'R,4'S)-4'-Hydroxy-1',2'-epoxy-2',6',6'-trimethylcyclohex-1'-yl]-4-methylhexa-1,3,5-triene (6).** A mixture of diene alcohol **11** (74 mg, 0.29 mmol) and manganese dioxide (1.17 g) in diethyl ether (2.35 mL) was stirred at room temperature for 20 min. The precipitate was filtered through a pad of Celite, and the filtrate was concentrated *in vacuo* to afford crude aldehyde, which was used in the next reaction without further purification.

To a suspension of methyltriphenylphosphonium bromide (314 mg, 0.88 mmol) in THF (1.32 mL) was added dropwise sodium bis(trimethylsilyl)amide (1.0M in THF, 0.88 mL, 0.88 mmol) at 0 °C. After the mixture was stirred for 5 min at 0 °C, a solution of the crude aldehyde obtained above in THF (0.30 mL) was added. After being stirred for 5 min at room temperature, the resulting mixture was poured into water, and extracted with ethyl acetate. The organic layers were combined, washed with brine, dried over  $\text{MgSO}_4$ , filtered and concentrated *in vacuo*. Purification by silica gel column chromatography (from 10% to 50% ethyl acetate in hexane) afforded triene **6** (47 mg, 72%) as a white solid:  $[\alpha]_{\text{D}}^{25} -52.6$  (c 0.77,  $\text{CHCl}_3$ ); IR (KBr disk,  $\text{cm}^{-1}$ ) 3451, 2963, 2929, 2367, 1655, 1560, 1420, 1381, 1217, 985, 906, 758;  $^1\text{H}$  NMR ( $\text{CDCl}_3$ , 400 MHz)  $\delta$  6.69 (dddd,  $J = 17.0, 10.1, 6.4, 0.9$  Hz, 1H), 6.25 (d,  $J = 15.6$ , 1H), 6.09 (d,  $J = 11.5$  Hz, 1H), 5.89 (d,  $J = 15.1$  Hz, 1H), 5.25 (d,  $J = 16.9$  Hz, 1H), 5.14 (d,  $J = 10.0$  Hz, 1H), 3.90 (m, 1H), 2.37 (ddd,  $J = 13.7, 5.1, 2.0$  Hz, 1H), 1.88 (s, 3H), 1.62 (m, 2H), 1.24 (dd,  $J = 12.8, 11.0$  Hz, 1H), 1.18 (s, 3H), 1.14 (s, 3H), 0.97 (s, 3H);  $^{13}\text{C}$  NMR ( $\text{CDCl}_3$ , 100 MHz)  $\delta$  137.4, 135.0, 133.4, 132.0, 124.8, 118.2, 70.5, 67.2, 64.6, 47.5, 41.3, 35.6, 29.9, 25.2, 20.3, 13.1; ESI-HRMS  $m/z$  calcd for  $\text{C}_{16}\text{H}_{24}\text{O}_2\text{Na}$  ( $\text{M}+\text{Na}$ ) $^+$  271.1674, found 271.1662.

**C30-violaxanthin derivative (3).** To a solution of triene **6** (16 mg, 0.064 mmol) in toluene (0.65 mL) was added Grubbs second-generation catalyst (3 mg, 0.003 mmol). After being stirred for 15 min at 45 °C, the reaction mixture was poured into water, and then extracted with ethyl acetate. The organic layers were combined, washed with brine, dried over  $\text{MgSO}_4$ , filtered and concentrated *in vacuo*. Purification by silica gel column chromatography (from 30% to 60%

ethyl acetate in hexane) afforded C30-violaxanthin derivative **3** (8 mg, 53%) as a yellow oil:  $[\alpha]_D^{24} -47.4$  (c 0.65, CHCl<sub>3</sub>); IR (neat, cm<sup>-1</sup>) 3570, 3451, 3019, 2964, 1660, 1626, 1215, 976, 758; <sup>1</sup>H NMR (CDCl<sub>3</sub>, 400 MHz)  $\delta$  6.58 (dd, *J* = 7.8, 2.8 Hz, 1H), 6.27 (d, *J* = 15.6, 1H), 6.19 (d, *J* = 9.7 Hz, 1H), 5.89 (d, *J* = 15.6 Hz, 1H), 3.90 (m, 1H), 2.38 (ddd, *J* = 14.2, 5.0, 1.8 Hz, 1H), 1.90 (s, 3H), 1.62 (m, 2H), 1.22 (dd, *J* = 12.8, 11.0 Hz, 1H), 1.18 (s, 3H), 1.14 (s, 3H), 0.97 (s, 3H); <sup>13</sup>C NMR (CDCl<sub>3</sub>, 100 MHz)  $\delta$  137.4, 135.0, 133.4, 132.0, 124.8, 118.2, 70.5, 67.2, 64.6, 47.5, 41.3, 35.6, 29.9, 25.2, 20.3, 13.1; ESI-HRMS *m/z* calcd for C<sub>30</sub>H<sub>44</sub>O<sub>4</sub>Na (M+Na)<sup>+</sup> 491.3137, found 491.3151.

**(2E,4E,6E)-7-(Tributylstannyl)-3,7-dimethylhexa-2,4,6-triene-1-ol (13)**. To a solution of ester **12** (2.08 g, 4.44 mmol) in dichloromethane (44.4 mL) was added dropwise diisobutylaluminium hydride (1.0 M in toluene, 13.3 mL, 13.3 mmol) at -78 °C. After the reaction mixture was stirred for 10 min at the same temperature, aqueous potassium sodium (+)-tartrate tetrahydrate solution was added, and then resulting mixture was extracted with ethyl acetate. The organic layers were combined, washed with brine, dried over MgSO<sub>4</sub>, filtered and concentrated *in vacuo*. Purification by silica gel column chromatography (from 10% to 30% ethyl acetate in hexane in 3% triethyl amine) afforded alcohol **13** (1.60 g, 84%) as a yellow oil: IR (neat, cm<sup>-1</sup>) 3393, 2853, 1714, 1616, 1464, 1373, 1253, 1072, 960, 758; <sup>1</sup>H NMR (CDCl<sub>3</sub>, 400 MHz)  $\delta$  6.63 (dd, *J* = 15.1, 10.5 Hz, 1H), 6.26 (dd, *J* = 11.0, 1.4 Hz, 1H), 6.21 (d, *J* = 15.6 Hz, 1H), 5.70 (t, *J* = 6.9 Hz, 1H), 4.31 (t, *J* = 5.9 Hz, 2H), 2.03 (d, *J* = 1.4 Hz, 3H), 1.84 (s, 3H), 1.49 (m, 6H), 1.31 (m, 6H), 0.90 (m, 15H); <sup>13</sup>C NMR (CDCl<sub>3</sub>, 100 MHz)  $\delta$  145.5, 139.5, 137.4, 136.0, 130.3, 123.5, 59.9, 29.5, 27.8, 20.4, 14.1, 13.0, 9.5.

**(2E,4E,6E,8E)-9-[(1'S,2'R,4'S)-4'-Hydroxy-1',2'-epoxy-2',6',6'-trimethylcyclohexa-1'-yl]-3,7-dimethylnona-2,4,6,8-tetraene-1-ol (14)**. To a solution of vinyl iodide **9** (308 mg, 0.99 mmol) and stannane **13** (470 mg, 1.10 mmol) in DMF (5.0 mL) was added diisopropylethylamine (0.52 mL, 3.00 mmol), Pd(PPh<sub>3</sub>)<sub>4</sub> (58 mg, 0.050 mmol) and lithium chloride (84 mg, 2.00 mmol). After being stirred for 30 min at 65 °C, the reaction mixture was poured into water, and then extracted with ethyl acetate. The organic layers were combined, washed with brine, dried over MgSO<sub>4</sub>, filtered and concentrated *in vacuo*. Purification by silica gel column chromatography (from 30% to 50% ethyl acetate in hexane) afforded **14** (202 mg, 64%) as a white solid:  $[\alpha]_D^{25} -26.4$  (c 0.99, MeOH); IR (KBr disk, cm<sup>-1</sup>) 3449, 2963, 2870, 1695, 1466, 1303, 1184, 1122, 1047, 953, 914; <sup>1</sup>H NMR (CDCl<sub>3</sub>, 400 MHz)  $\delta$  6.54 (dd, *J* = 15.1, 11.0

Hz, 1H), 6.28 (d,  $J=15.1$ , 1H), 6.25 (d,  $J=14.9$  Hz, 1H), 6.12 (d,  $J=11.5$  Hz, 1H), 5.85 (d,  $J=15.6$  Hz, 1H), 5.68 (t,  $J=6.9$  Hz, 1H), 4.28 (d,  $J=6.8$  Hz, 2H), 3.87 (m, 1H), 2.35 (ddd,  $J=14.2$ , 5.1, 1.9 Hz, 1H), 1.89 (s, 3H), 1.83 (s, 3H), 1.59 (m, 2H), 1.21 (dd,  $J=12.9$ , 10.6 Hz, 1H), 1.16 (s, 3H), 1.12 (s, 3H), 0.95 (s, 3H);  $^{13}\text{C}$  NMR ( $\text{CDCl}_3$ , 100 MHz)  $\delta$  137.7, 137.5, 137.0, 134.8, 131.9, 131.0, 125.1, 124.3, 70.6, 67.3, 64.6, 59.8, 47.5, 41.3, 35.6, 29.9, 25.2, 20.3, 13.3, 13.0; ESI-HRMS  $m/z$  calcd for  $\text{C}_{20}\text{H}_{30}\text{O}_3\text{Na}$  ( $\text{M}+\text{Na}$ ) $^+$  341.2093, found 341.2079.

**(3E,5E,7E,9E)-10-[(1'S,2'R,4'S)-4'-Hydroxy-1',2'-epoxy-2',6',6'-trimethylcyclohex-1'-yl]-4,8-dimethyldeca-1,3,5,7,9-pentaene (4).** A mixture of alcohol **14** (129 mg, 0.41 mmol) and manganese dioxide (1.62 g) in THF (3.24 mL) was stirred at room temperature for 50 min. The precipitate was filtered through a pad of Celite, and the filtrate was concentrated *in vacuo* to afford crude aldehyde, which was used in the next reaction without further purification.

To a suspension of methyltriphenylphosphonium bromide (434 mg, 1.22 mmol) in THF (2.03 mL) was added dropwise sodium bis(trimethylsilyl)amide (1.0M in THF, 1.22 mL, 1.22 mmol) at 0 °C. The mixture was stirred for 5 min at -20 °C, and then a solution of crude aldehyde in THF (0.30 mL) was added. After being stirred for 5 min at the same temperature, the resulting mixture was poured into water, and extracted with ethyl acetate. The organic layers were combined, washed with brine, dried over  $\text{MgSO}_4$ , filtered and concentrated *in vacuo*. Purification by silica gel column chromatography (from 20% to 50% ethyl acetate in hexane) afforded pentaene **4** (89 mg, 70%) as a yellow solid:  $[\alpha]_{\text{D}}^{24} -14.9$  (c 0.20,  $\text{CHCl}_3$ ); IR (KBr disk,  $\text{cm}^{-1}$ ) 3449, 3017, 2929, 1655, 1381, 1215, 1045, 908, 758;  $^1\text{H}$  NMR ( $\text{CDCl}_3$ , 400 MHz)  $\delta$  6.71 (dddd,  $J=16.5$ , 11.5, 10.1, 1.4 Hz, 1H), 6.59 (d,  $J=15.1$ , 11.0 Hz, 1H), 6.33 (d,  $J=15.1$  Hz, 1H), 6.28 (d,  $J=15.5$  Hz, 1H), 6.17 (d,  $J=11.4$  Hz, 1H), 6.13 (d,  $J=11.0$  Hz, 1H), 5.87 (d,  $J=15.5$  Hz, 1H), 5.26 (d,  $J=16.5$  Hz, 1H), 5.14 (d,  $J=10.0$  Hz, 1H), 3.90 (m, 1H), 2.37 (ddd,  $J=14.2$ , 5.0, 1.8 Hz, 1H), 1.92 (s, 3H), 1.91 (s, 3H), 1.62 (m, 2H), 1.21 (dd,  $J=12.9$ , 10.6 Hz, 1H), 1.18 (s, 3H), 1.14 (s, 3H), 0.97 (s, 3H);  $^{13}\text{C}$  NMR ( $\text{CDCl}_3$ , 100 MHz)  $\delta$  138.3, 137.6, 136.5, 134.6, 133.6, 132.6, 132.3, 125.2, 124.2, 118.1, 70.6, 67.3, 64.6, 60.7, 53.8, 47.5, 41.3, 35.7, 29.9, 25.2, 21.3, 20.3, 14.5, 13.3, 13.0; ESI-HRMS  $m/z$  calcd for  $\text{C}_{21}\text{H}_{30}\text{O}_2\text{Na}$  ( $\text{M}+\text{Na}$ ) $^+$  337.2143, found 337.2150.

**Violaxanthin (1).** To a solution of pentaene **4** (27 mg, 0.086 mmol) in toluene (0.86 mL) was added Grubbs second-generation catalyst (7 mg, 0.0086 mmol). After being stirred for 10 min at 60 °C, the reaction mixture was poured into water, and then extracted with ethyl acetate. The

organic layers were combined, washed with brine, dried over  $\text{MgSO}_4$ , filtered and concentrated *in vacuo*. Purification by silica gel column chromatography (from 30% to 60% ethyl acetate in hexane) afforded violaxanthin (**1**) (16 mg, 67%) as a crude product in a red film. The separation by preparative HPLC [column: Develosil CN-UG (0.6 x 25 cm); mobile phase: acetone / *n*-hexane = 1 / 11; flow rate: 2.0 mL / min.; UV detect: 470 nm; retention time: (all-*trans*-isomer) 40 min., in the dark, was afforded the desired optically active violaxanthin (**1**) as a red film: IR (neat,  $\text{cm}^{-1}$ ) 3467, 3019, 2928, 1901, 1630, 1469, 1368, 1215, 972, 756;  $^1\text{H}$  NMR ( $\text{CDCl}_3$ , 400 MHz)  $\delta$  6.63 (m, 1H), 6.60 (dd,  $J=15.1, 11.4$ , 1H), 6.37 (d,  $J=15.1$  Hz, 1H), 6.29 (d,  $J=15.1$  Hz, 1H), 6.28 (m, 1H), 6.19 (d,  $J=11.0$  Hz, 1H), 5.88 (d,  $J=15.6$  Hz, 1H), 3.91 (m, 1H), 2.39 (ddd,  $J=14.2, 5.1, 1.4$  Hz, 1H), 1.96 (s, 3H), 1.93 (s, 3H), 1.61 (m, 2H), 1.23 (m, 1H), 1.19 (s, 3H), 1.15 (s, 3H), 0.98 (s, 3H);  $^{13}\text{C}$  NMR ( $\text{CDCl}_3$ , 100 MHz)  $\delta$  138.5, 137.7, 136.8, 134.7, 133.2, 132.6, 130.5, 125.1, 124.2, 70.7, 67.3, 64.7, 60.8, 47.6, 41.4, 35.7, 29.9, 25.3, 20.4, 14.6, 13.3, 13.1; ESI-HRMS  $m/z$  calcd for  $\text{C}_{40}\text{H}_{56}\text{O}_4\text{Na}$  ( $\text{M}+\text{Na}$ ) $^+$  623.4076, found 623.4073.

**(3E, 5E, 7E)-10-[(1'R,2'R,4'S)-2',4'-Dihydroxy-2',6',6'-trimethylcyclohexylidene]-4,8-**

**dimethyldeca-1,3,5,7,9-pentaene (5).** A mixture of allenic alcohol **15** (165 mg, 0.52 mmol) and manganese dioxide (2.07 g) in ethyl acetate (5.18 mL) was stirred at room temperature for 20 min. The precipitate was filtered through a pad of Celite, and the filtrate was concentrated *in vacuo* to afford crude aldehyde, which was used in the next reaction without further purification.

To a suspension of methyltriphenylphosphonium bromide (195 mg, 0.54 mmol) in THF (1.10 mL) was added dropwise sodium bis(trimethylsilyl)amide (1.0M in THF, 0.53 mL, 0.53 mmol) at 0 °C. The mixture was stirred for 5 min at 0 °C, and then a solution of crude aldehyde (69 mg, 0.22 mmol) in THF (0.30 mL) was added. After being stirred for 10 min at the same temperature, the resulting mixture was poured into water, and extracted with ethyl acetate. The organic layers were combined, washed with brine, dried over  $\text{MgSO}_4$ , filtered and concentrated *in vacuo*. Purification by silica gel column chromatography (from 20% to 50% ethyl acetate in hexane) afforded **5** (30 mg, 44%) as a yellow solid:  $[\alpha]_D^{24} -28.1$  (c 0.57  $\text{CHCl}_3$ ); IR (KBr disk,  $\text{cm}^{-1}$ ) 3335, 2926, 1929, 1455, 1439, 1375, 1161, 956;  $^1\text{H}$  NMR ( $\text{CDCl}_3$ , 400 MHz)  $\delta$  6.72 (dddd,  $J=16.5, 10.9, 10.1, 1.4$  Hz, 1H), 6.45 (dd,  $J=15.1, 11.4$  Hz, 1H), 6.30 (d,  $J=15.1$  Hz, 1H), 6.12 (d,  $J=10.5$  Hz, 1H), 6.09 (d,  $J=10.5$  Hz, 1H), 6.02 (s, 1H), 5.26 (d,  $J=16.5$  Hz, 1H), 5.14 (d,  $J=10.6$  Hz, 1H), 4.13 (m, 1H), 2.26 (ddd,  $J=12.8, 4.1, 2.2$  Hz, 1H), 2.00 (m, 1H), 1.93 (m, 1H), 1.92 (s, 3H), 1.79 (s, 3H), 1.35 (s, 3H), 1.33 (s, 3H), 1.06 (s, 3H);  $^{13}\text{C}$  NMR ( $\text{CD}_3\text{OD}$ , 100 MHz)  $\delta$  204.4, 138.9, 138.2, 135.4, 134.1, 133.8, 130.0, 127.2, 119.3, 118.6, 104.6, 74.0, 65.6, 37.5,

33.8, 32.2, 30.4, 15.0, 13.5; ESI-HRMS  $m/z$  calcd for  $C_{21}H_{30}O_2Na$  ( $M+Na$ )<sup>+</sup> 337.2143, found 337.2139.

**Mimulaxanthin (2).** To a solution of allenic tetraene **5** (31 mg, 0.099 mmol) in toluene (1.91 mL) was added Grubbs second-generation catalyst (4 mg, 0.0048 mmol) at 4 times at 5 min intervals. After being stirred for 5 min at 60 °C, the reaction mixture was poured into water, and then extracted with ethyl acetate. The organic layers were combined, washed with brine, dried over  $MgSO_4$ , filtered and concentrated *in vacuo*. Purification by silica gel column chromatography (from 50% ethyl acetate in hexane to 15% methanol in chloroform) afforded mimulaxanthin (**2**) (17 mg, 56%) as a crude product in a red film. The separation by preparative HPLC [column: Develosil CN-UG (0.6 x 25 cm); mobile phase: acetone / *n*-hexane = 1 / 6; flow rate: 2.0 mL / min.; UVdetect: 468 nm; retention time: (all-*trans*-isomer) 49 min., in the dark, was afforded the desired optically active mimulaxanthin (**2**) as a red film: IR (KBr disk,  $cm^{-1}$ ) 3449, 2926, 2372, 1655, 1458, 1263, 1070, 958;  $^1H$  NMR ( $CD_3OD$ , 400 MHz)  $\delta$  6.67 (dd,  $J = 7.2, 2.7$  Hz, 1H), 6.60 (dd,  $J = 15.1, 11.4$ , 1H), 6.35 (d,  $J = 15.1$  Hz, 1H), 6.27 (d,  $J = 10.1$  Hz, 1H), 6.12 (d,  $J = 8.2$  Hz, 1H), 6.04 (s, 1H), 4.20 (m, 1H), 2.19 (m, 1H), 1.96 (s, 3H), 1.87 (m, 2H), 1.82 (s, 3H), 1.33 (s, 3H), 1.30 (s, 3H), 1.06 (s, 3H);  $^{13}C$  NMR ( $CD_3OD$ , 100 MHz)  $\delta$  204.6, 139.2, 138.3, 134.5, 133.9, 132.1, 130.3, 126.9, 119.3, 104.7, 74.0, 65.6, 37.5, 33.8, 32.2, 30.4, 28.7, 28.5, 28.1, 15.0, 13.5; ESI-HRMS  $m/z$  calcd for  $C_{40}H_{56}O_4Na$  ( $M+Na$ )<sup>+</sup> 623.4076, found 623.4063.

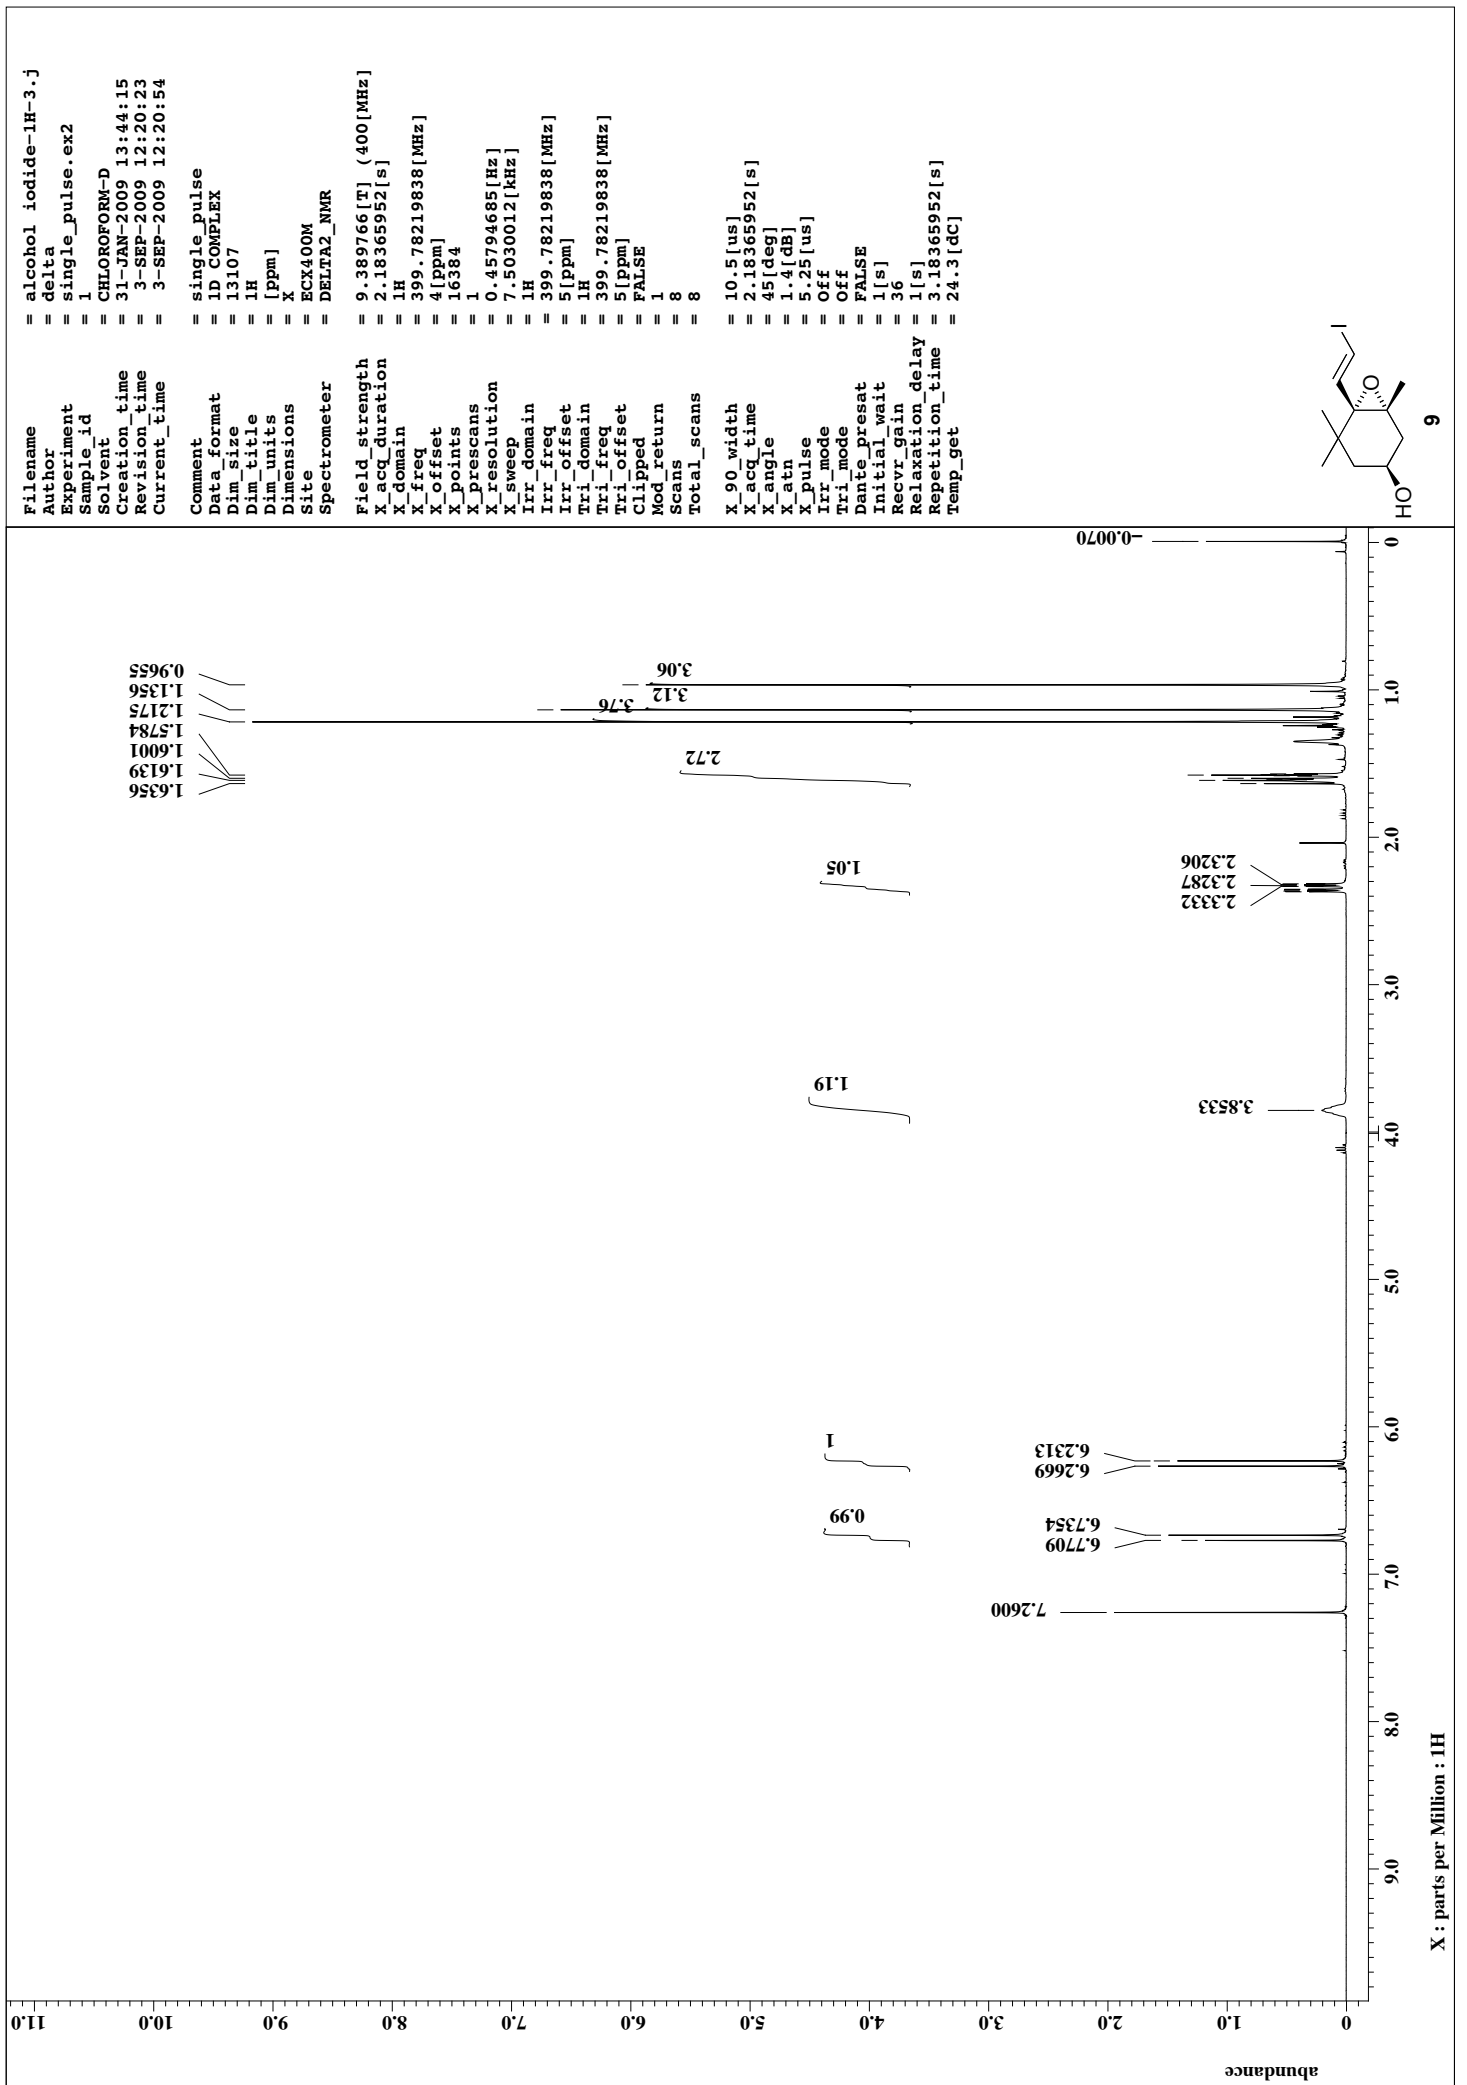

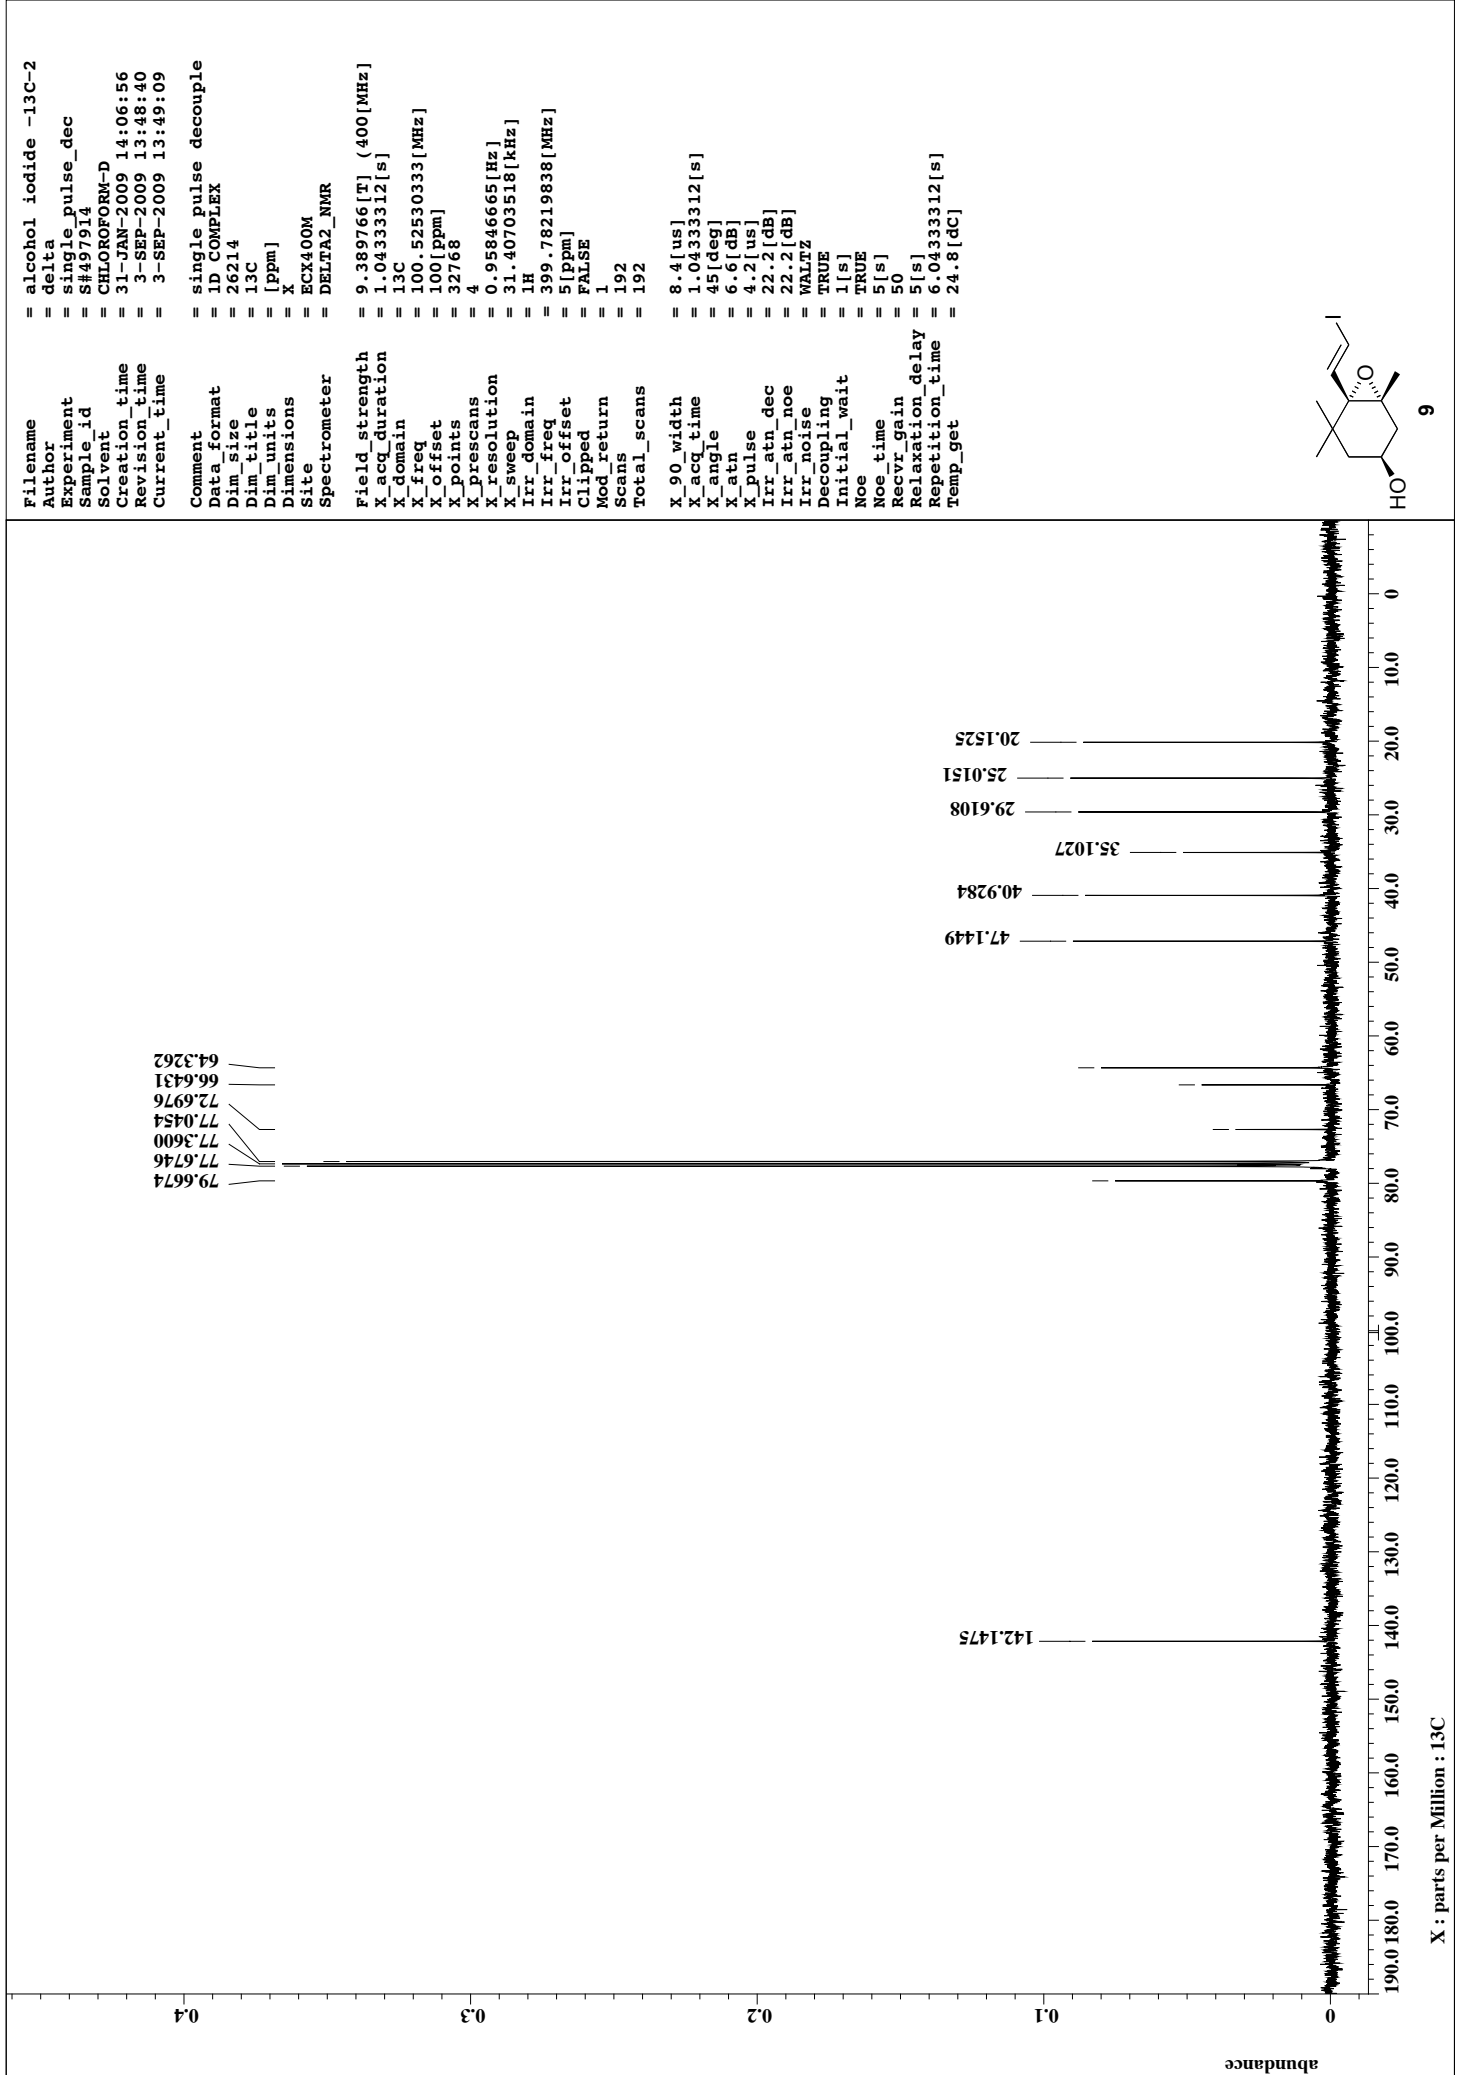



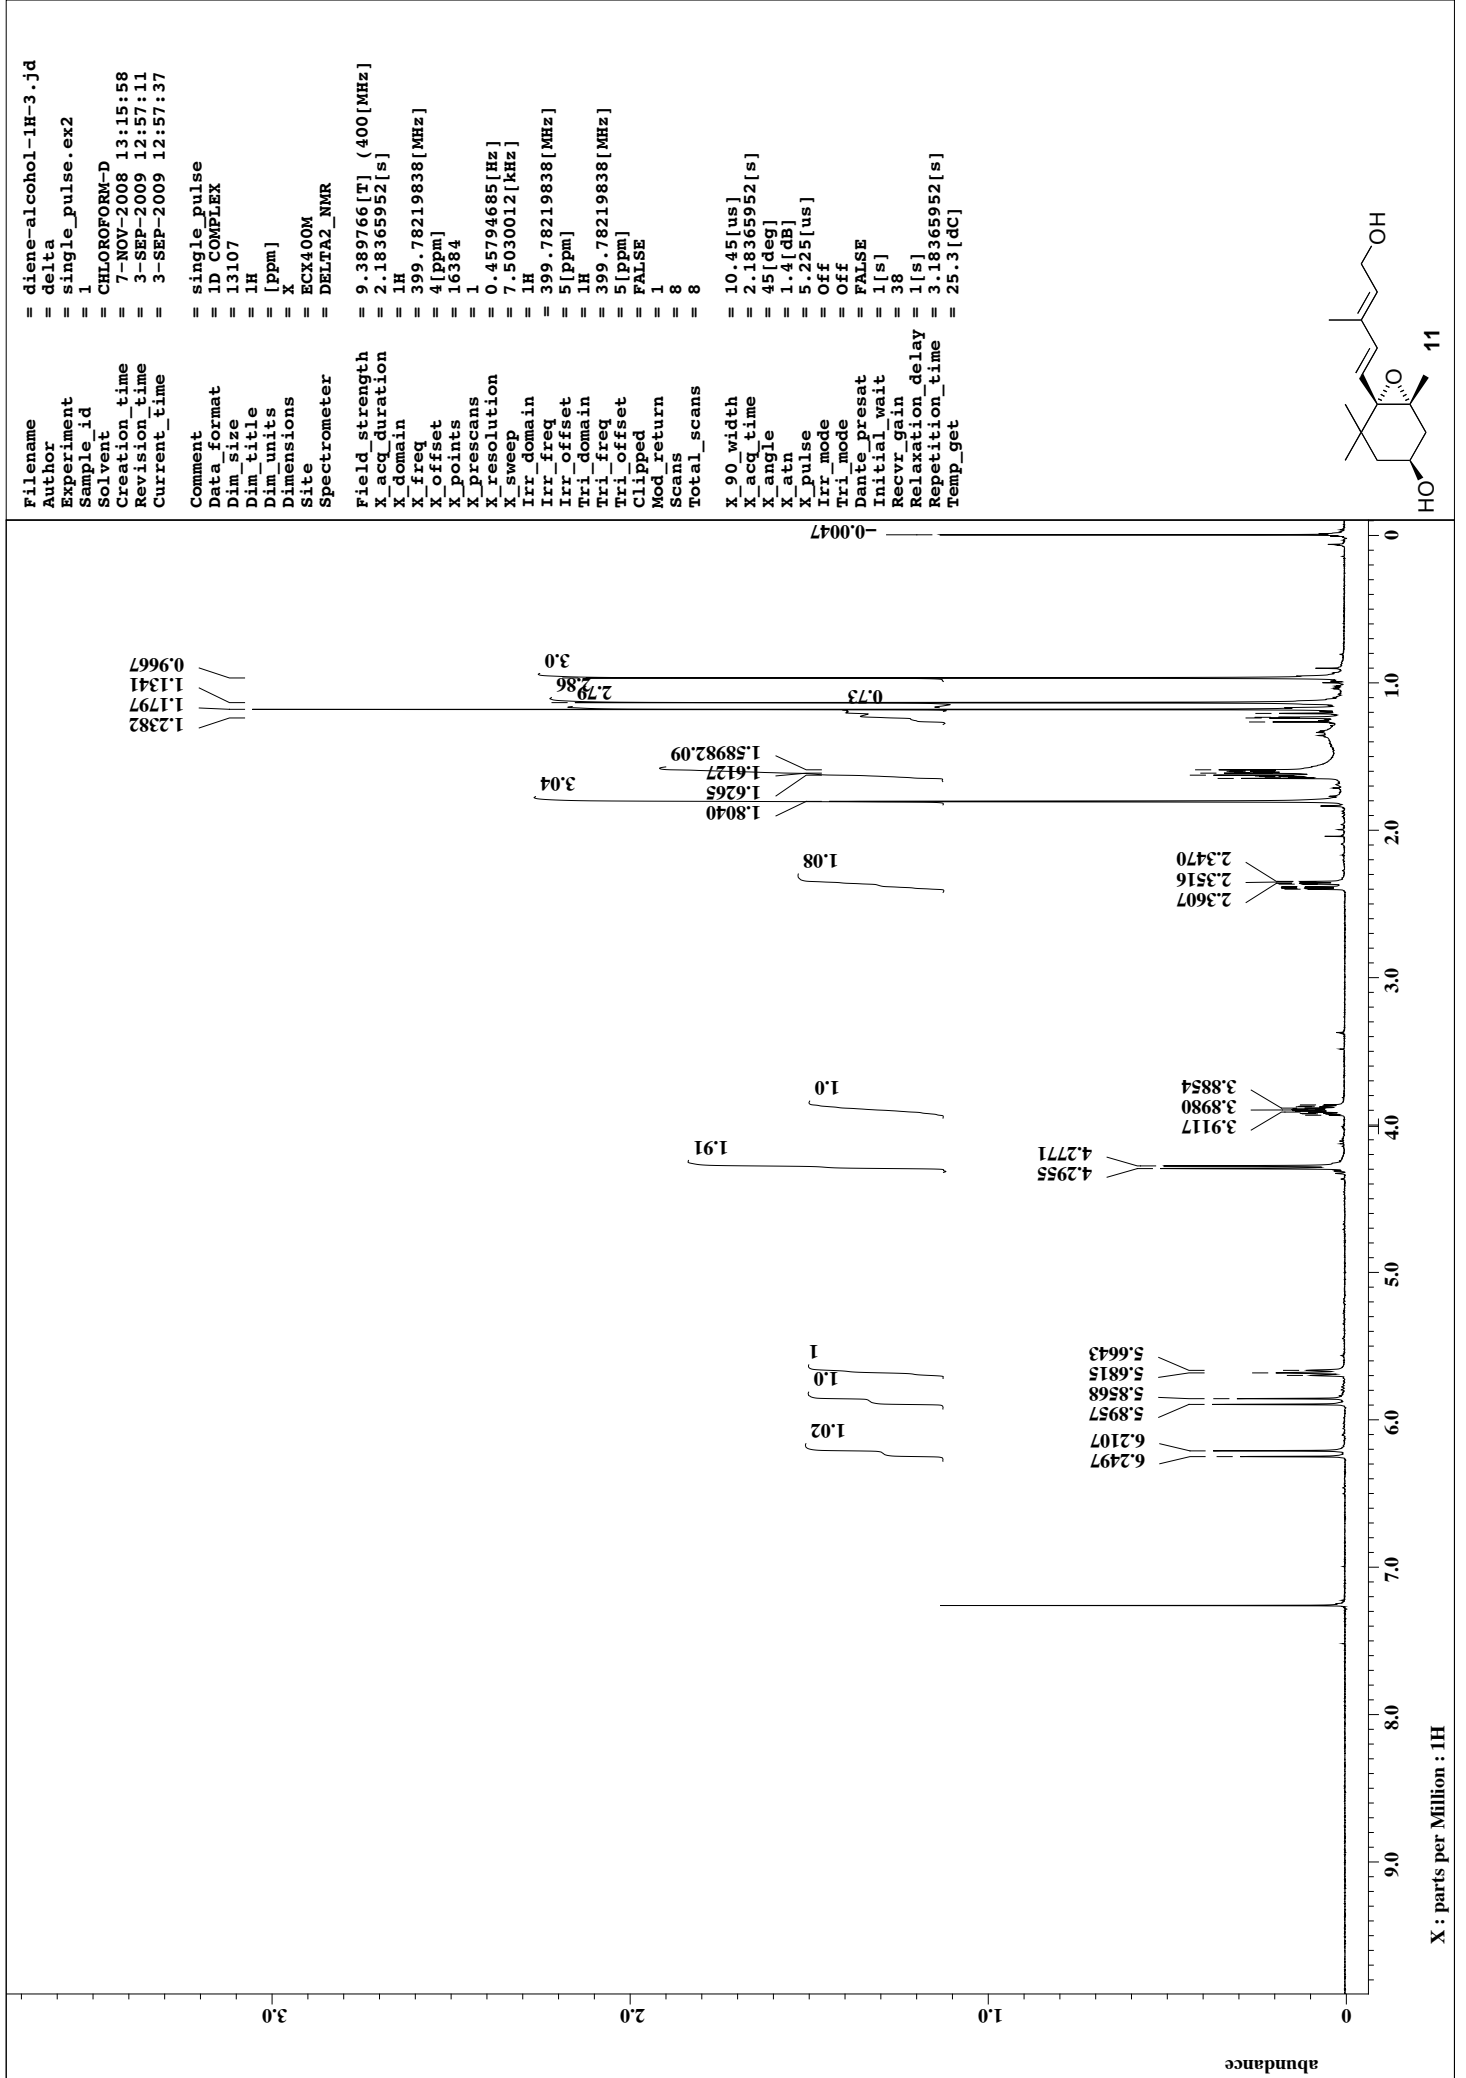

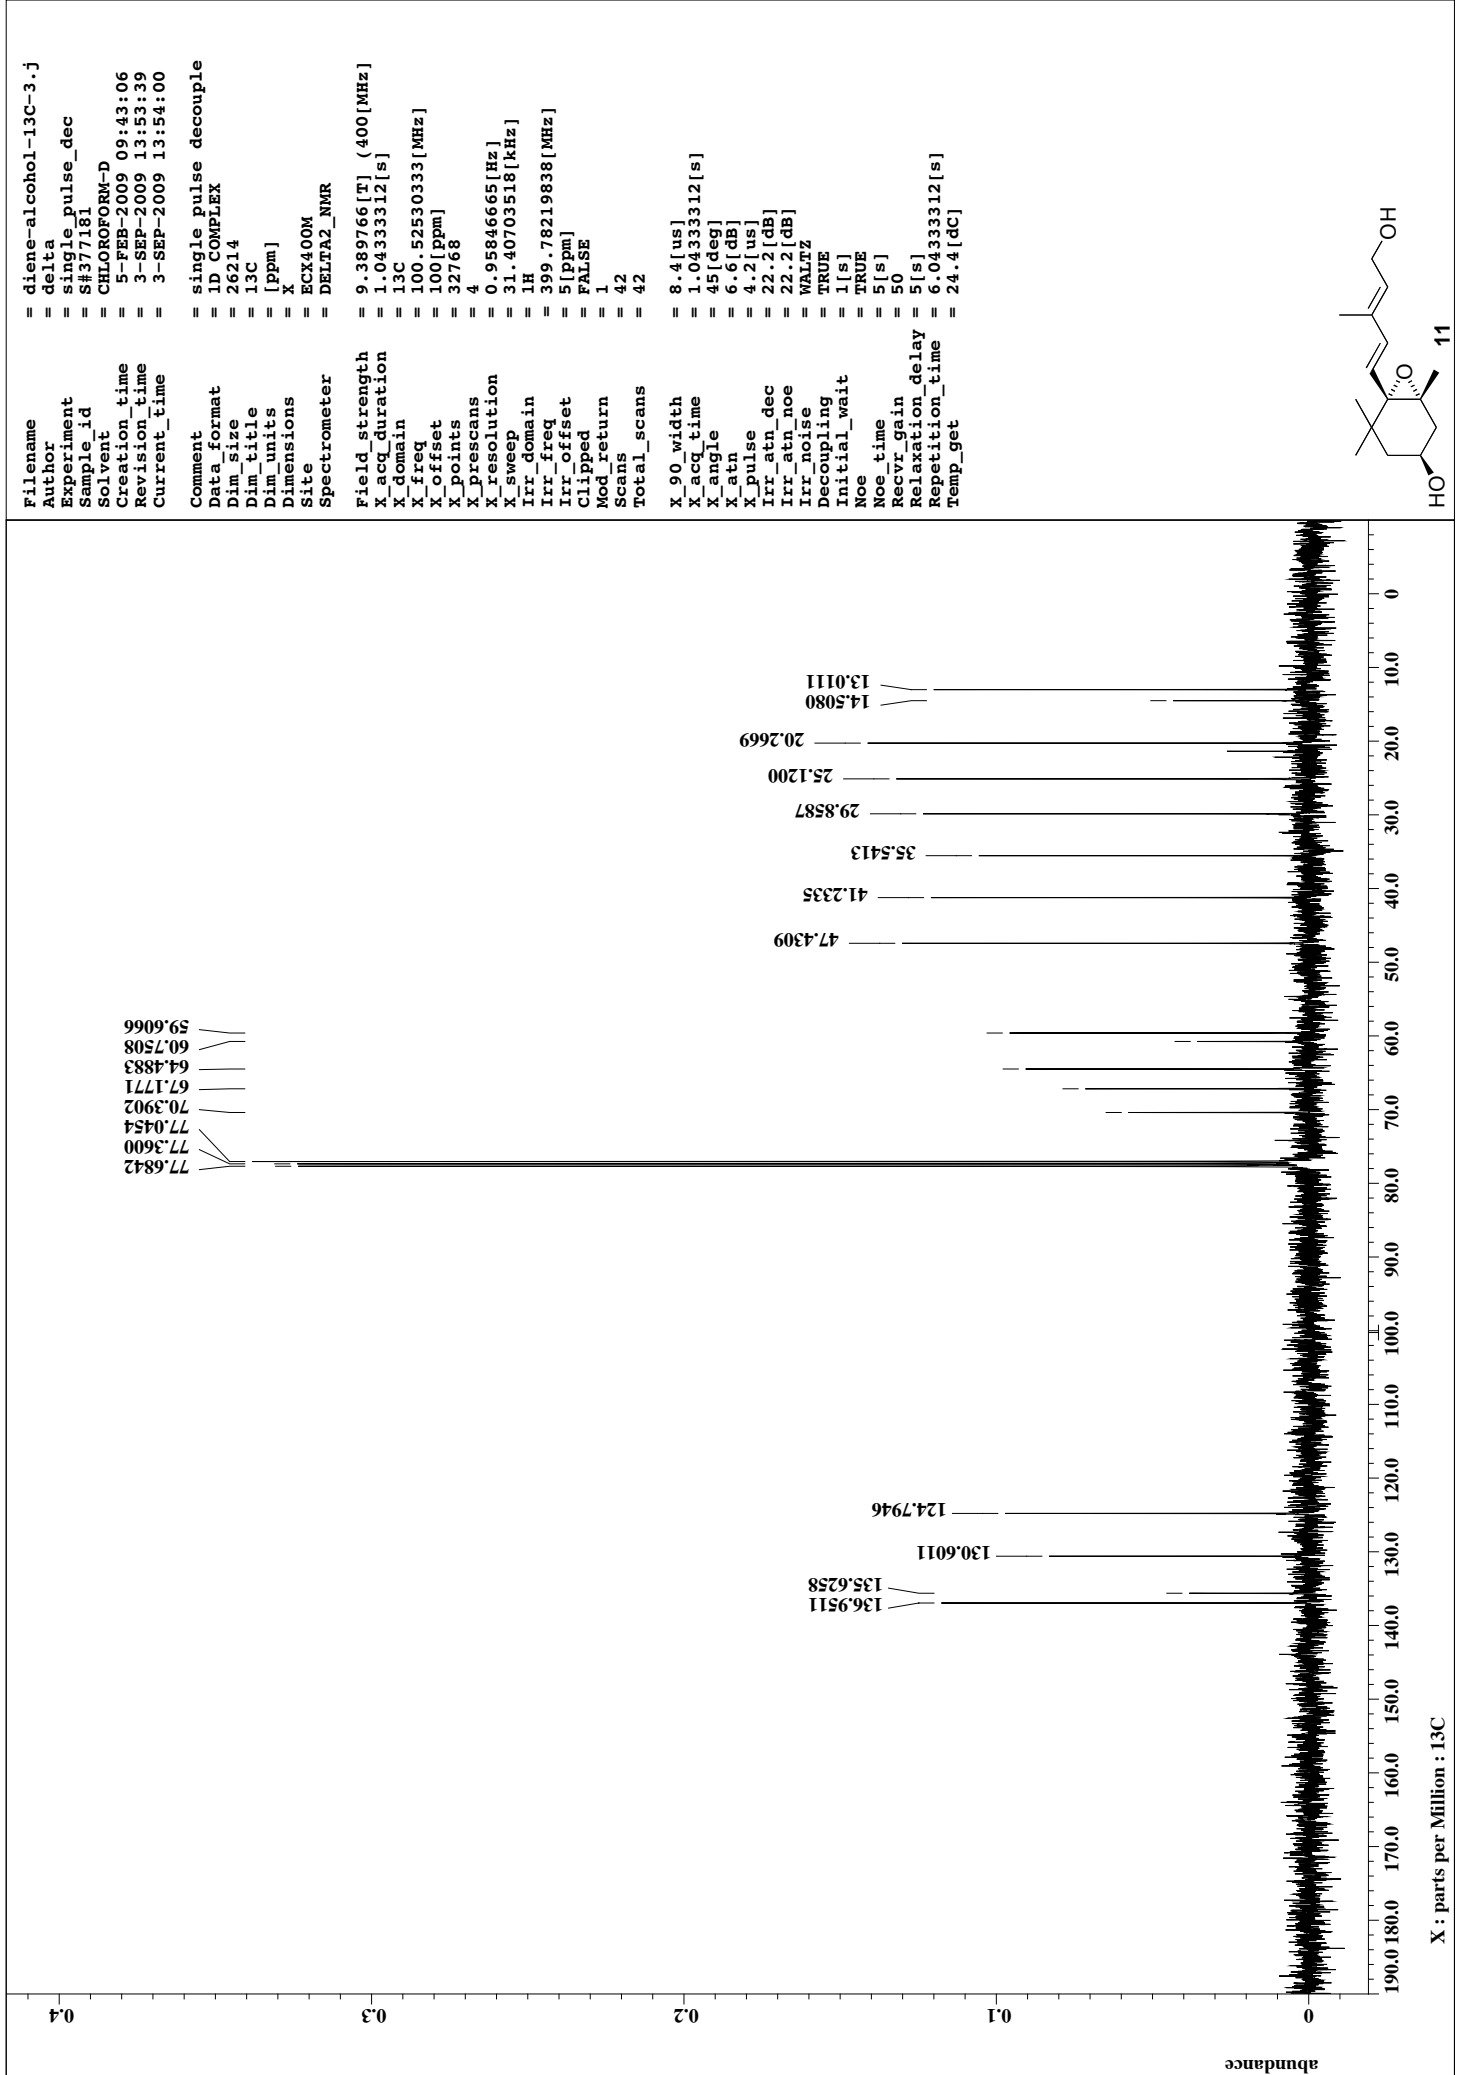

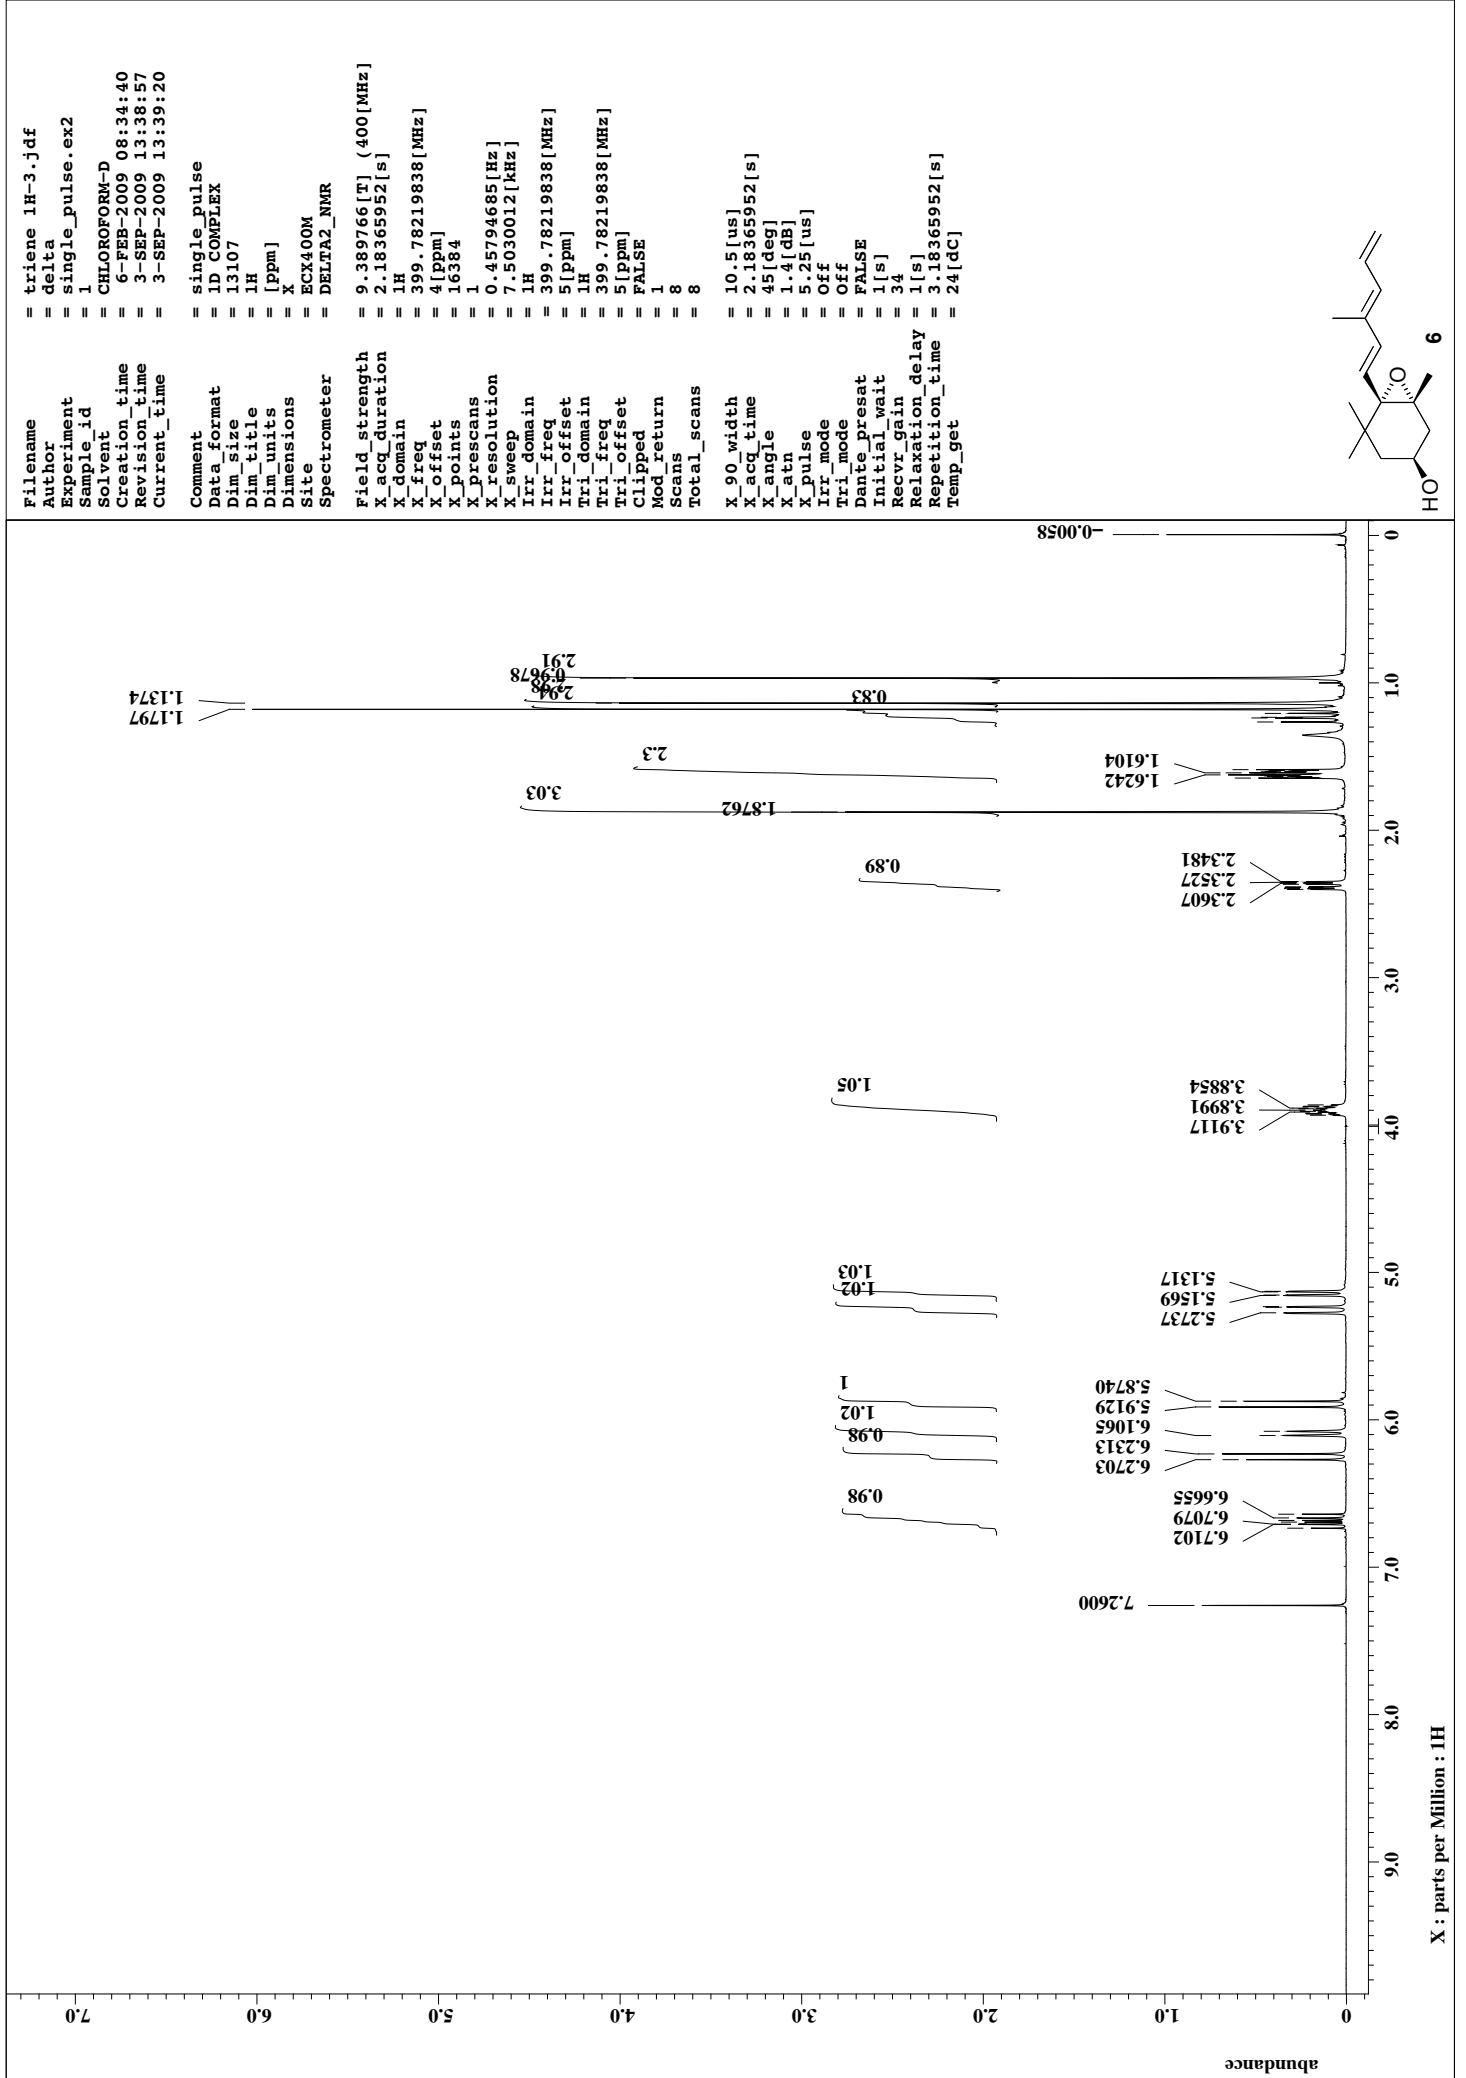

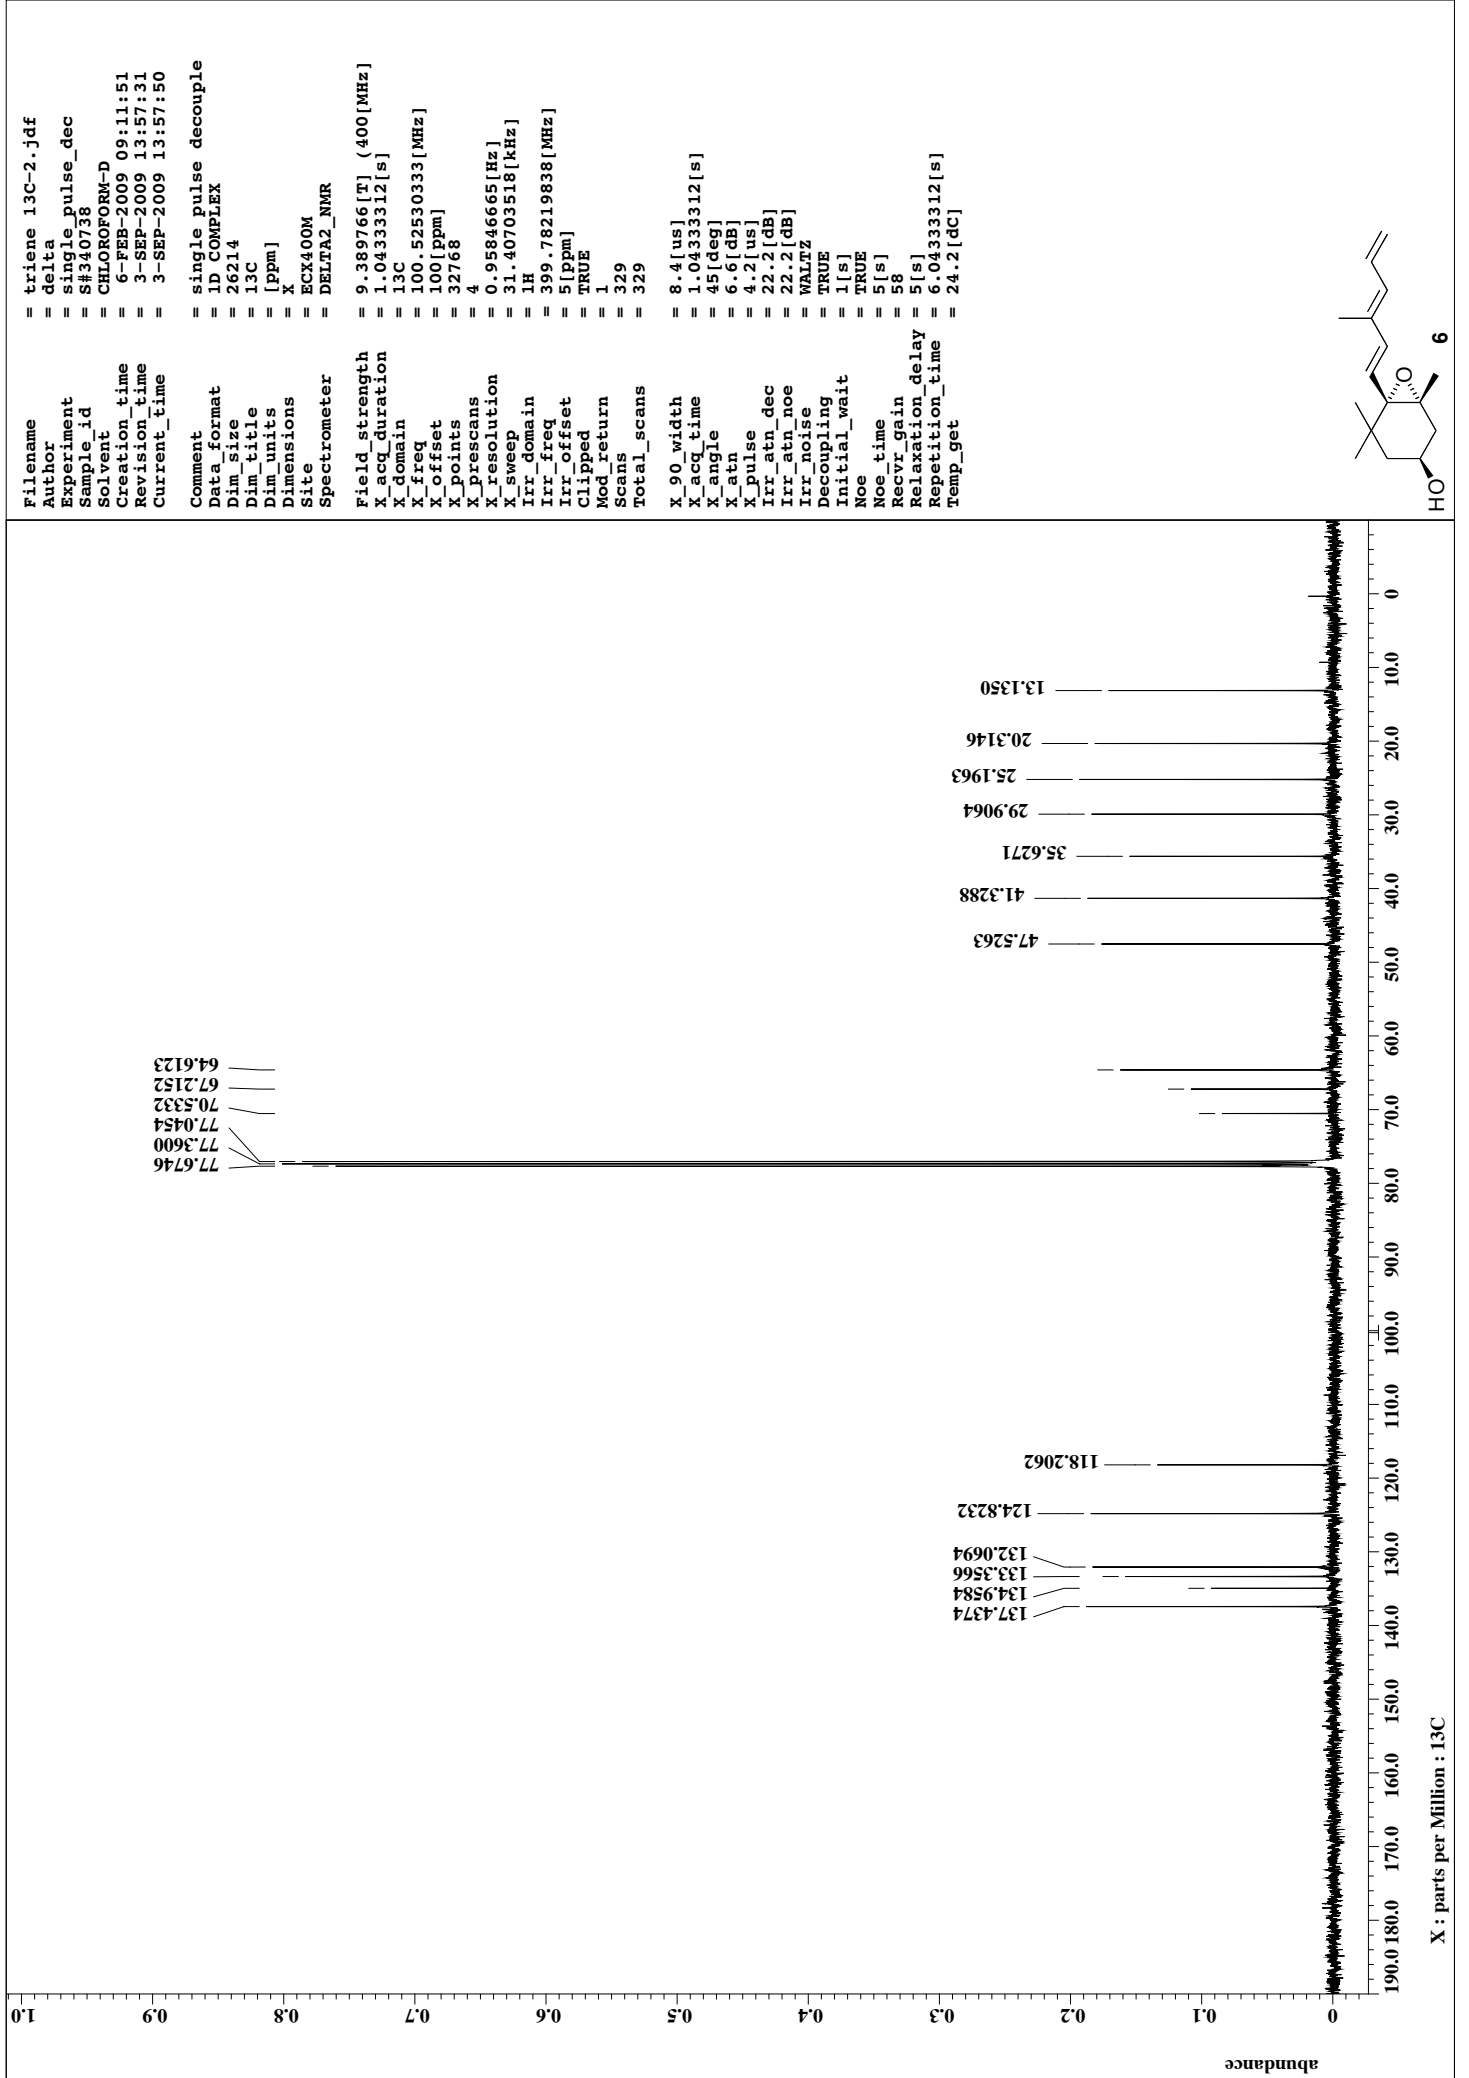

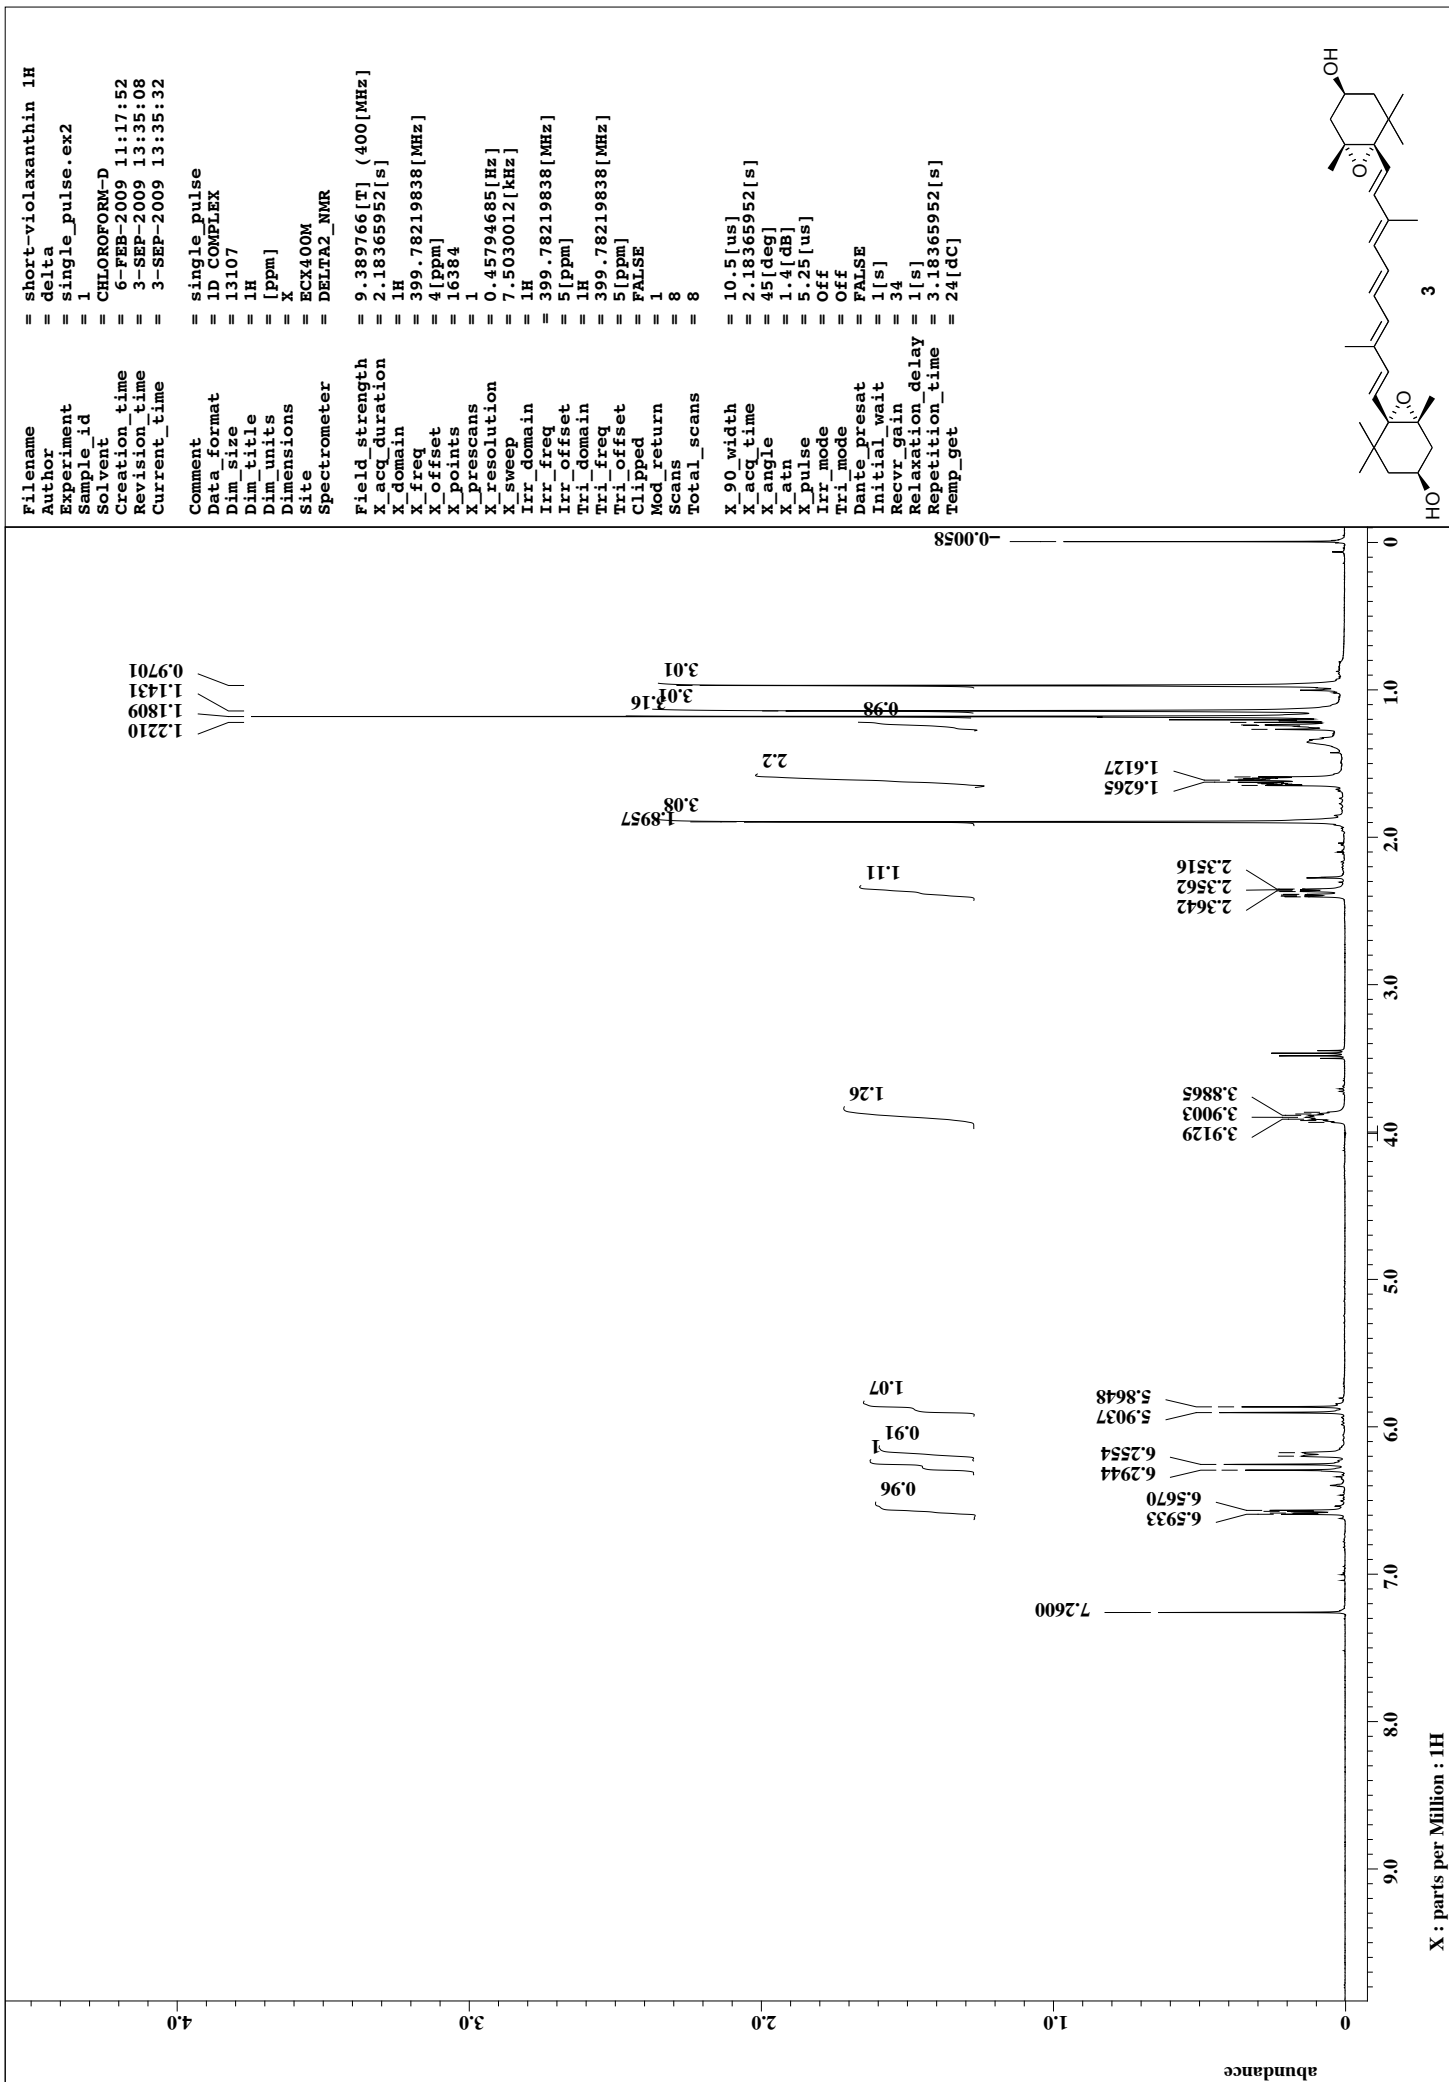

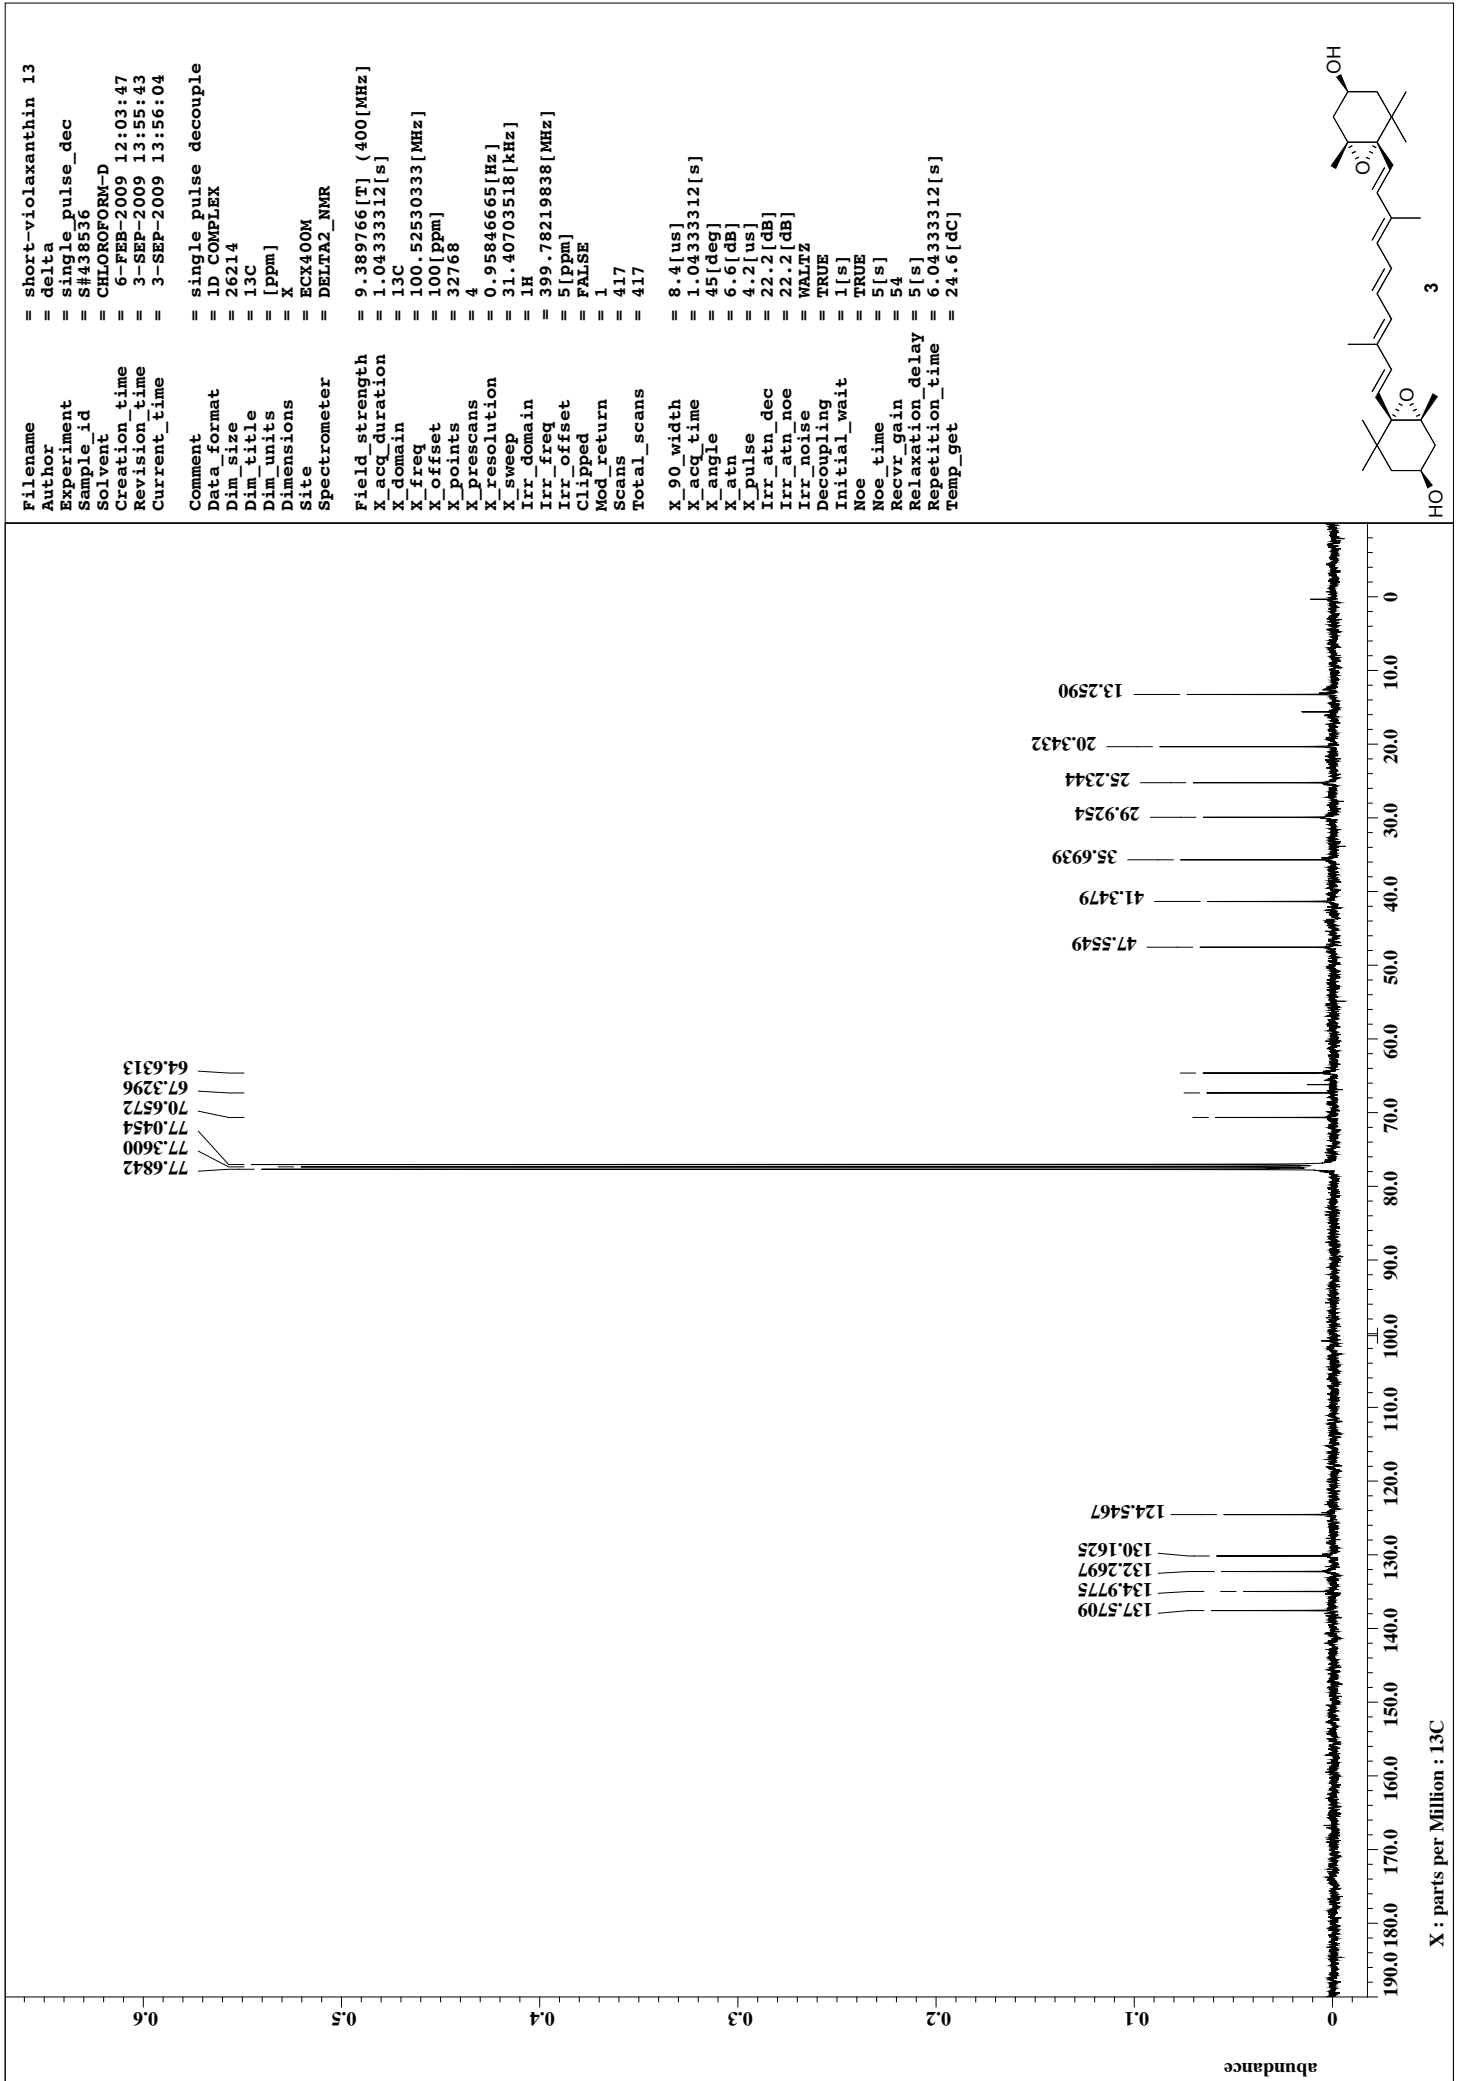

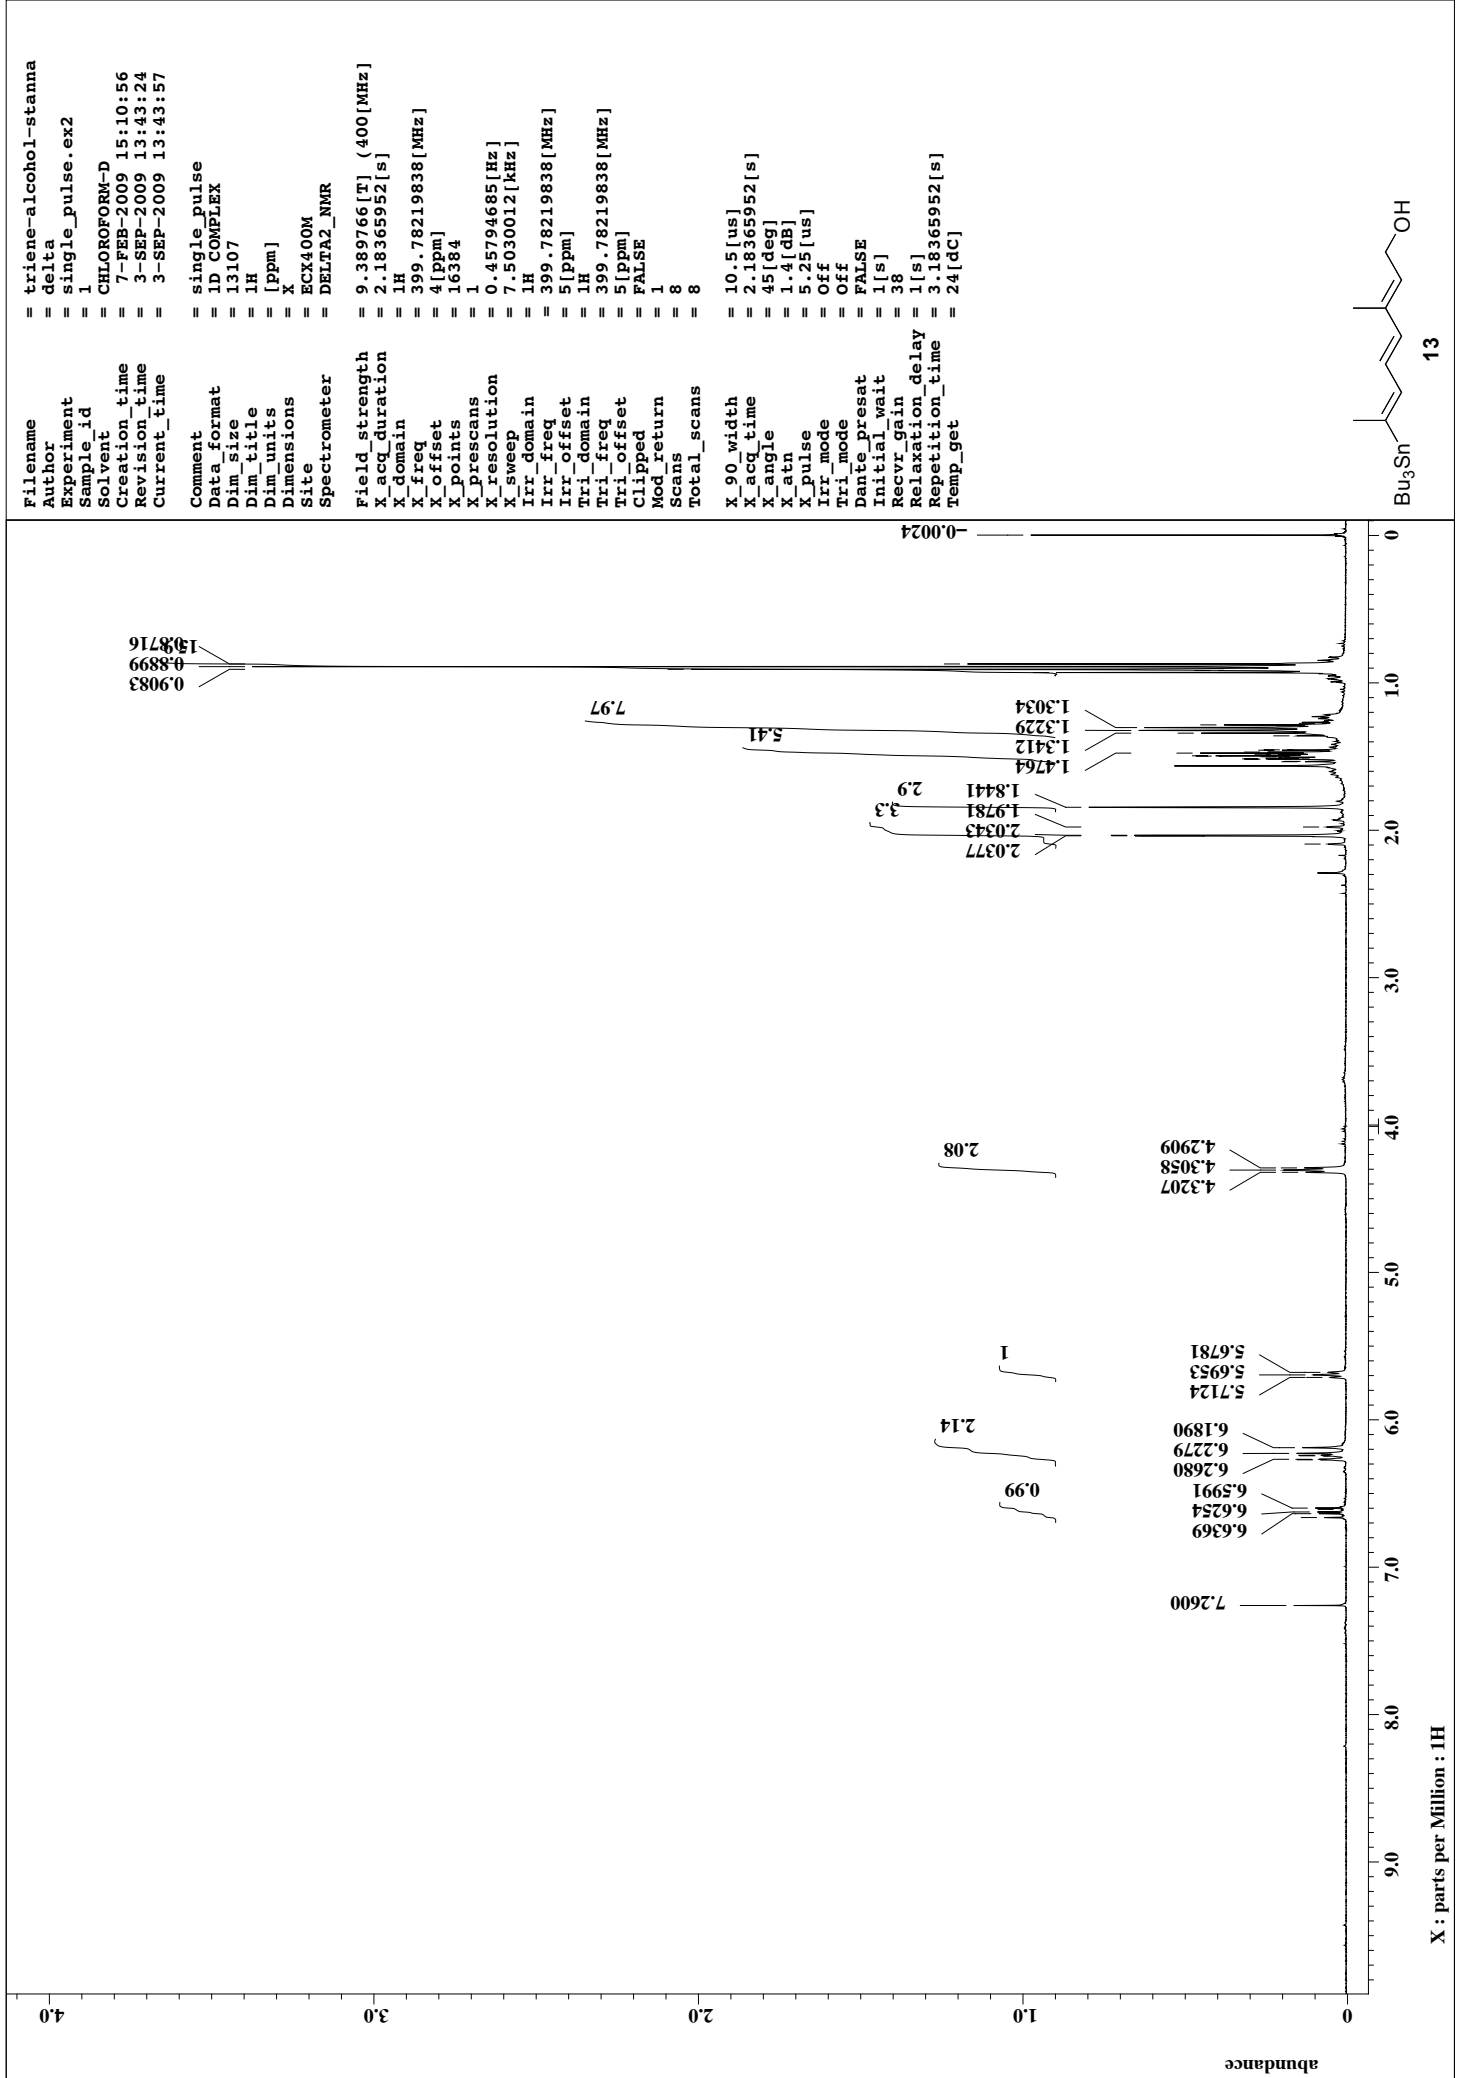

```

File name      = triene-alcohol-stanna
Author         = delta
Experiment    = single_pulse.ex2
Sample ID     = 1
Solvent       = CHLOROFORM-D
Creation time  = 7-FEB-2009 15:10:56
Revision time  = 3-SEP-2009 13:43:24
Current time   = 3-SEP-2009 13:43:57

Comment       = single_pulse
Data format   = ID COMPLEX
Dim Size      = 13107
Dim Title     = 1H
Dim Units     = [ppm]
Dimensions    = X
Site          = ECX400M
Spectrometer  = DELTA2_NMR

Field strength = 9.389766[T] (400[MHz])
Acq duration   = 2.18365952[s]
X domain       = 1H
X freq         = 399.78219838[MHz]
X offset       = 4[ppm]
X points       = 16384
X prescans     = 1
X resolution   = 0.45794685[Hz]
X sweep        = 7.5030012[KHz]
Irr domain     = 1H
Irr freq       = 399.78219838[MHz]
Irr offset     = 5[ppm]
Tri domain     = 1H
Tri freq       = 399.78219838[MHz]
Tri offset     = 5[ppm]
Clipped        = FALSE
Mod return     = 1
Scans          = 8
Total_scans    = 8

X90 width     = 10.5[us]
X acq time     = 2.18365952[s]
X angle        = 45[deg]
X attn         = 1.4[dB]
X pulse        = 5.25[us]
Irr mode       = Off
Tri mode       = Off
Dante preset   = FALSE
Initial wait   = 1[s]
Recvr gain     = 38
Relaxation delay = 1[s]
Repetition time = 3.18365952[s]
Temp get       = 24[degC]
    
```

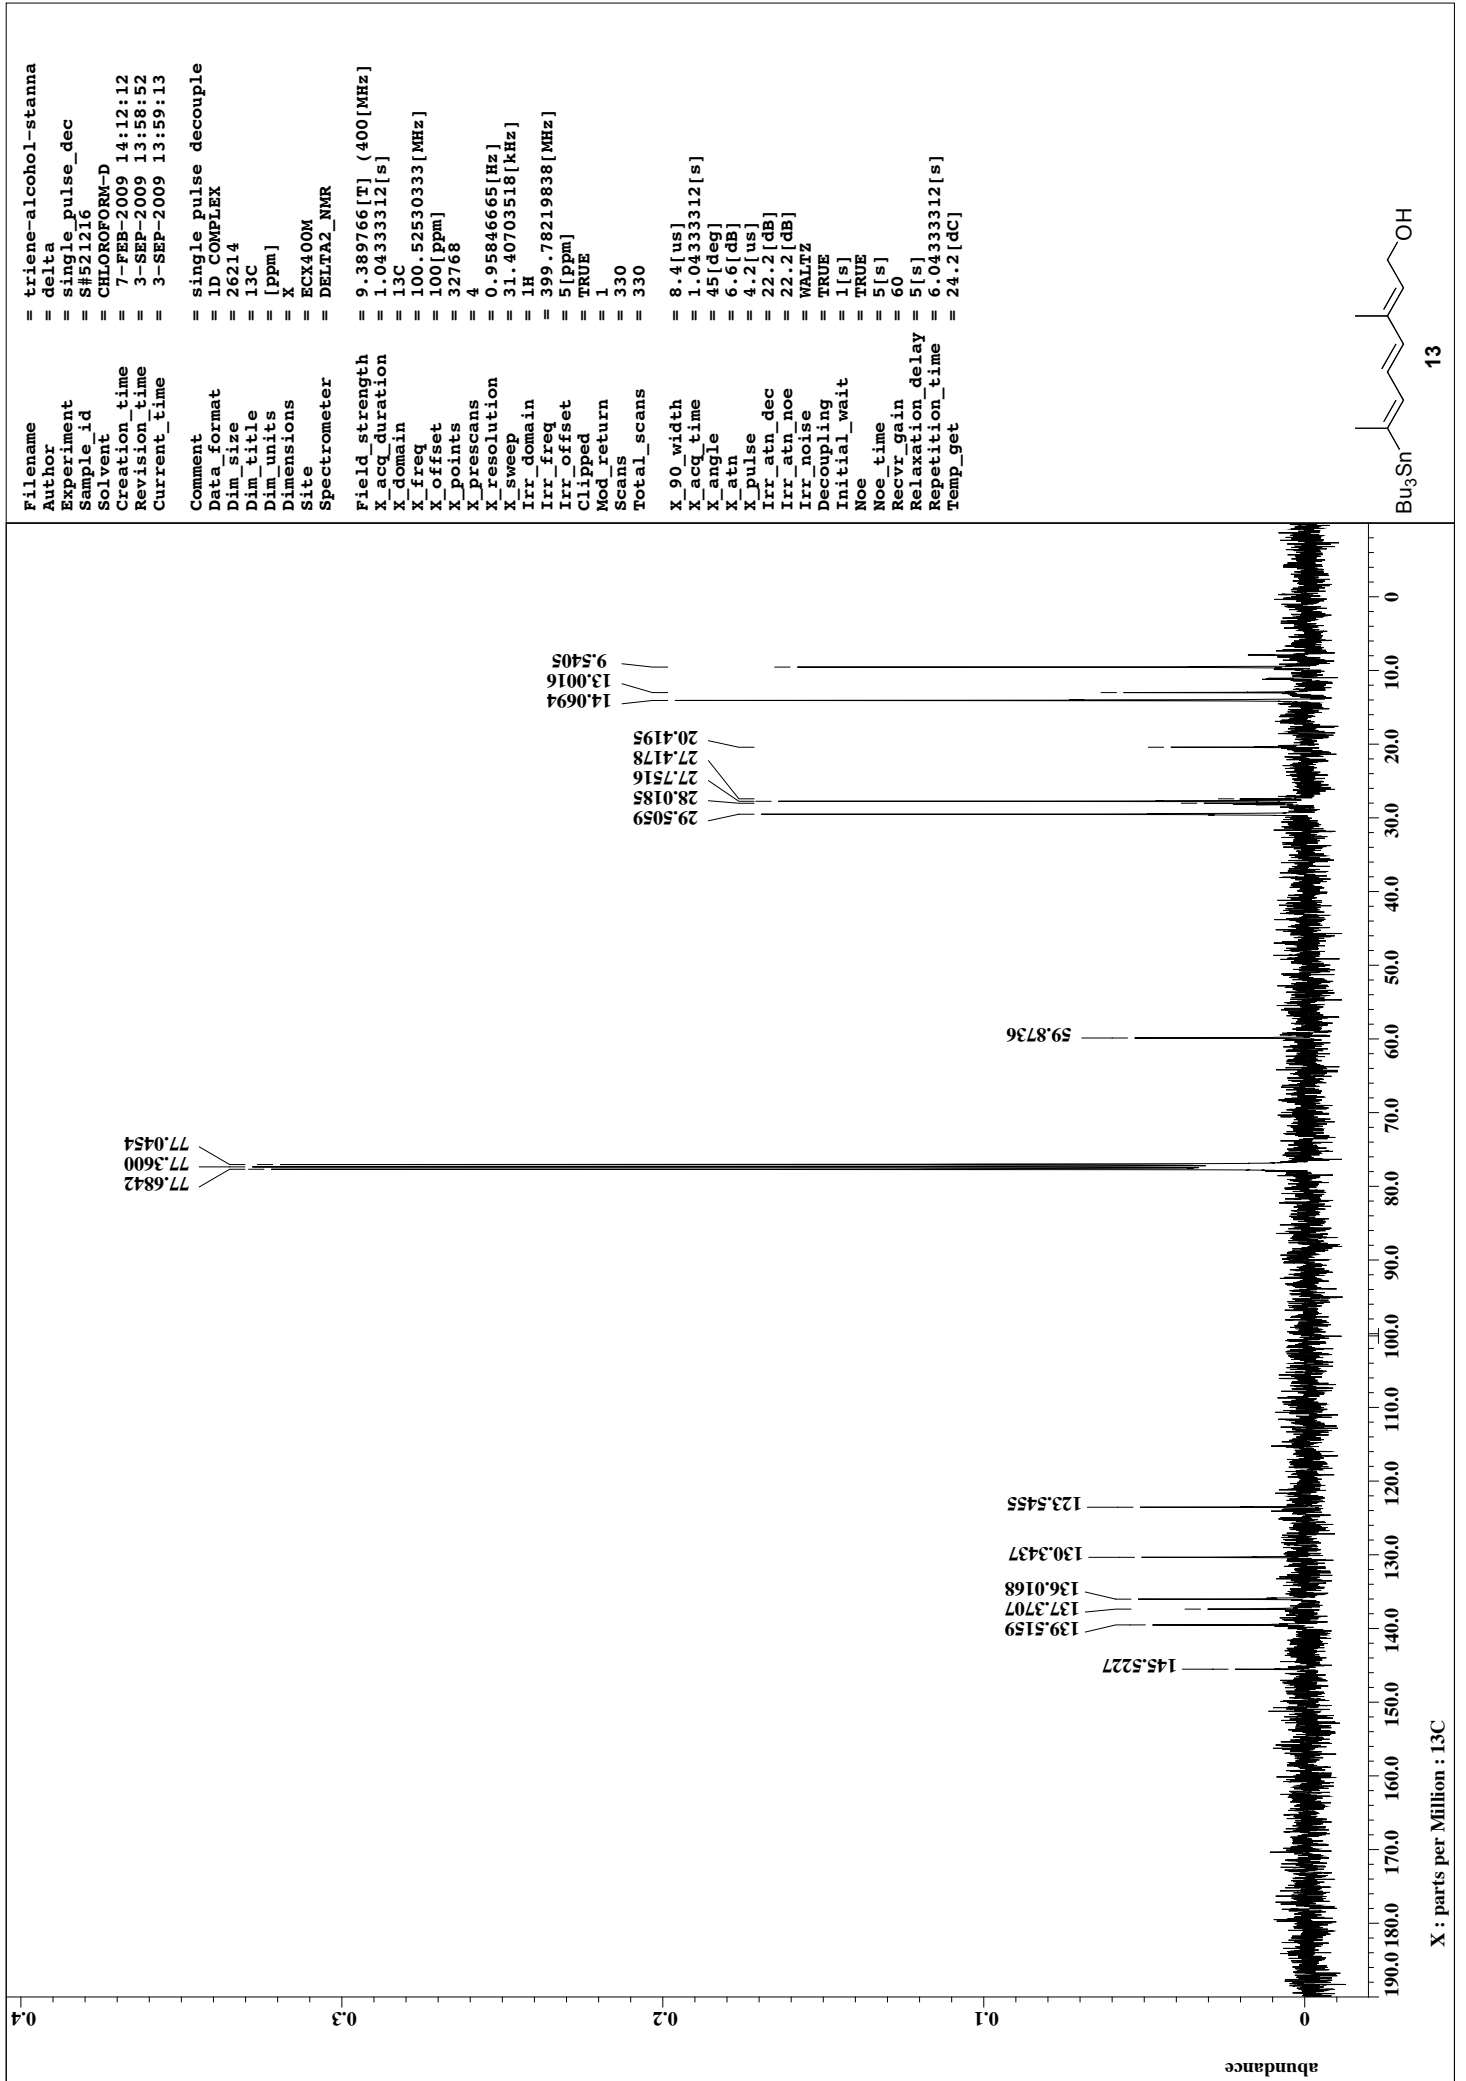



```

Filename = diene-alcohol-1H-3.jd
Author = delta
Experiment = single_pulse.ex2
Sample_id = 1
Solvent = CHLOROFORM-D
Creation_time = 5-FEB-2009 09:07:13
Revision_time = 3-SEP-2009 12:30:45
Current_time = 3-SEP-2009 12:31:46

Comment = single_pulse
Data_format = ID COMPLEX
Dim_size = 13107
Dim_title = 1H
Dim_units = [ppm]
Dimensions = X
Site = ECX400M
Spectrometer = DELTA2_NMR

Field_strength = 9.389766[T] (400[MHz])
X_acq_duration = 2.18365952[s]
X_domain = 1H
X_freq = 399.78219838[MHz]
X_offset = 4[ppm]
X_points = 16384
X_prescans = 1
X_resolution = 0.45794685[Hz]
X_sweep = 7.5030012[kHz]
Irr_domain = 1H
Irr_freq = 399.78219838[MHz]
Irr_offset = 5[ppm]
Tri_domain = 1H
Tri_freq = 399.78219838[MHz]
Tri_offset = 5[ppm]
Clipped = FALSE
Mod_return = 1
Scans = 8
Total_scans = 8

X_90_width = 10.5[us]
X_acq_time = 2.18365952[s]
X_angle = 45[deg]
X_atn = 1.4[dB]
X_pulse = 5.25[us]
Irr_mode = Off
Tri_mode = Off
Dante_presat = FALSE
Initial_wait = 1[s]
Recvr_gain = 30
Relaxation_delay = 1[s]
Repetition_time = 3.18365952[s]
Temp_get = 23.9[dc]
    
```

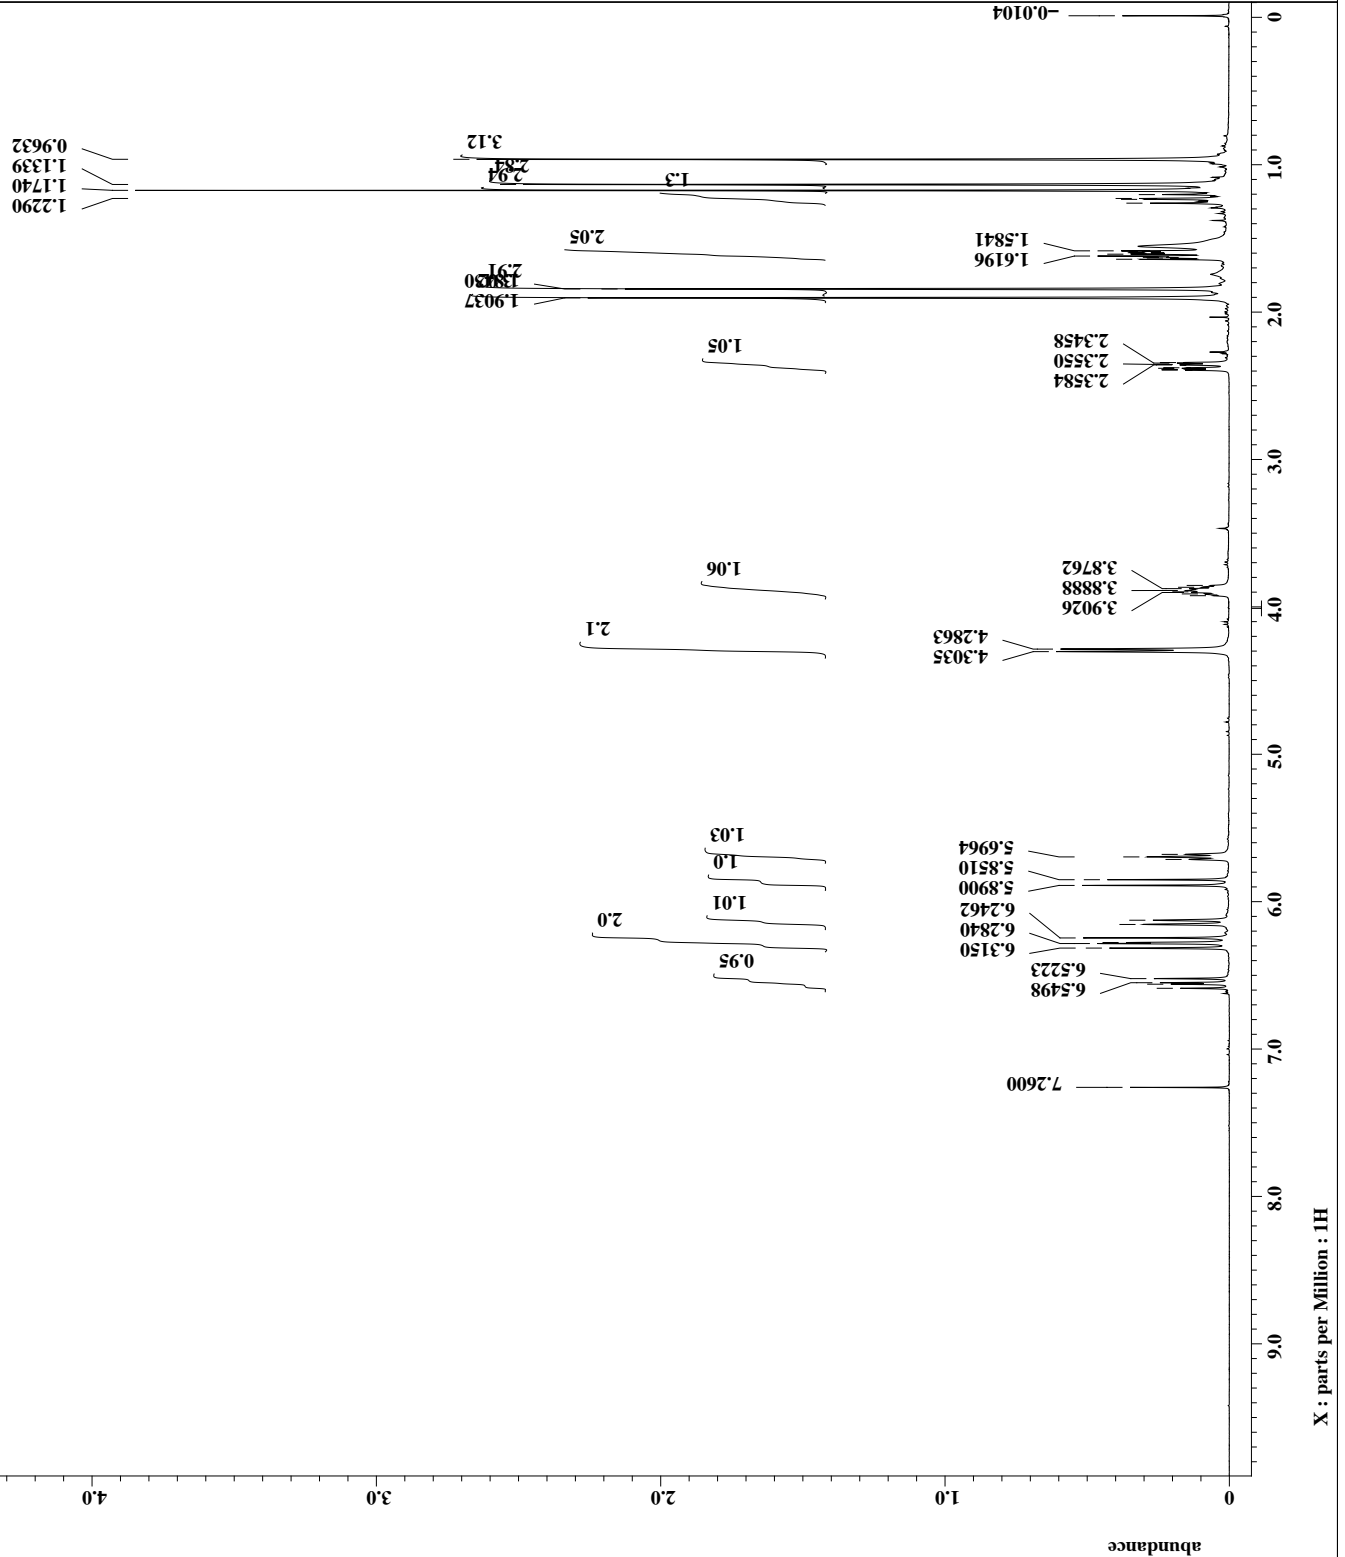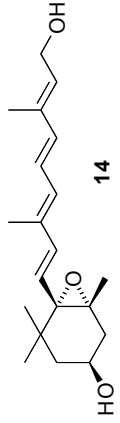

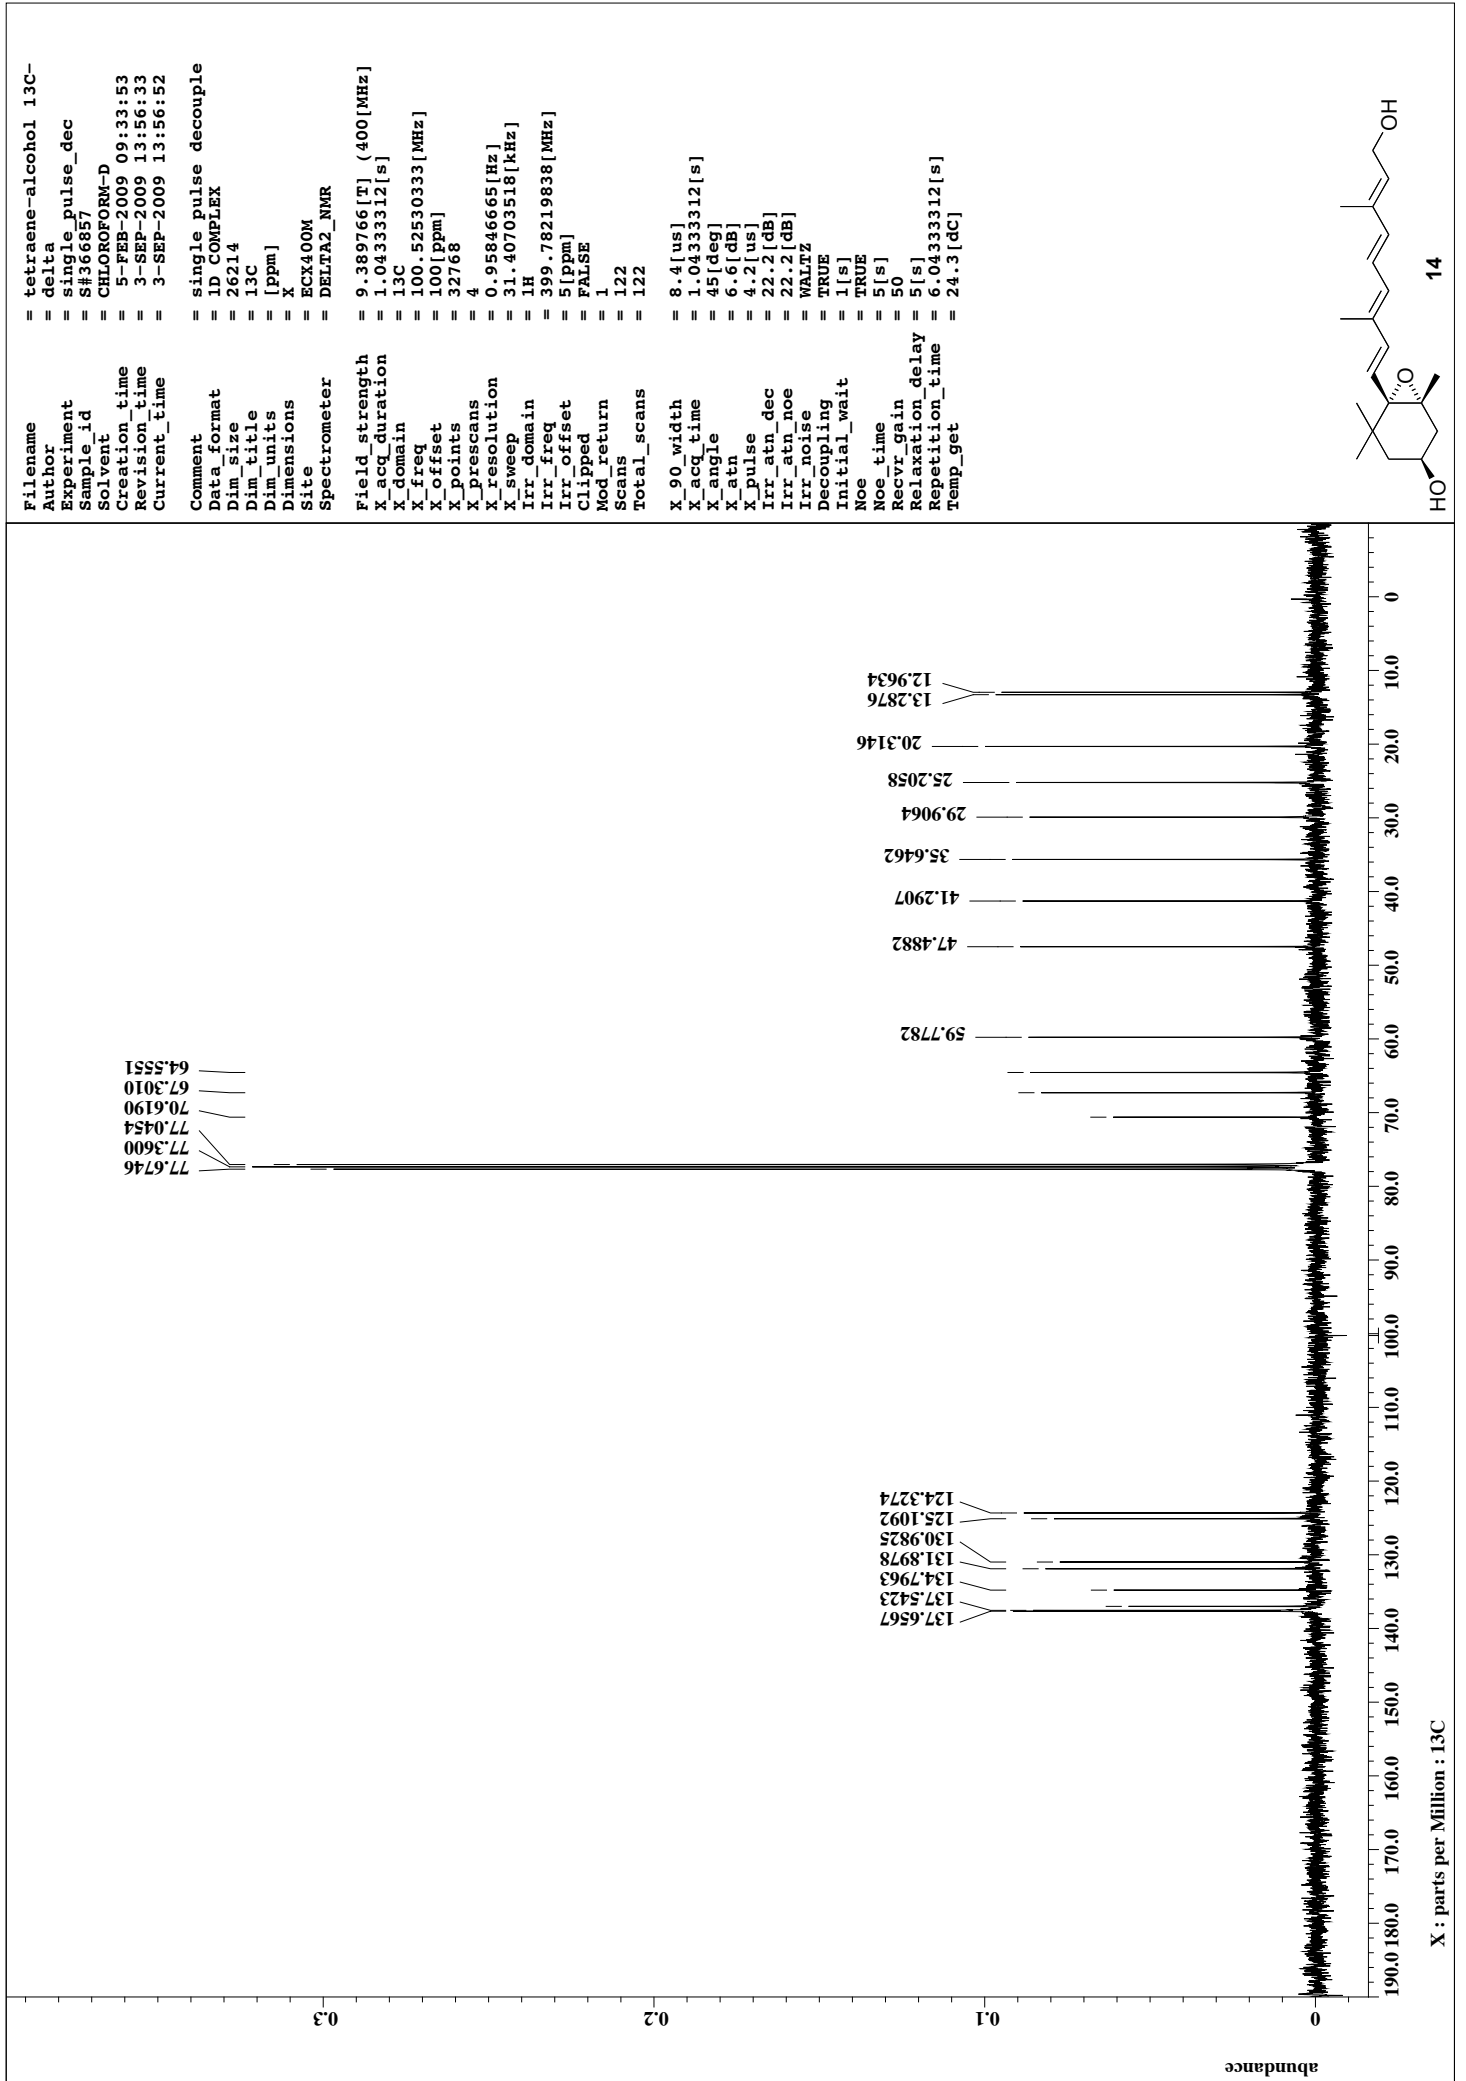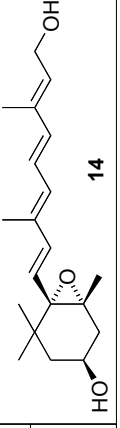

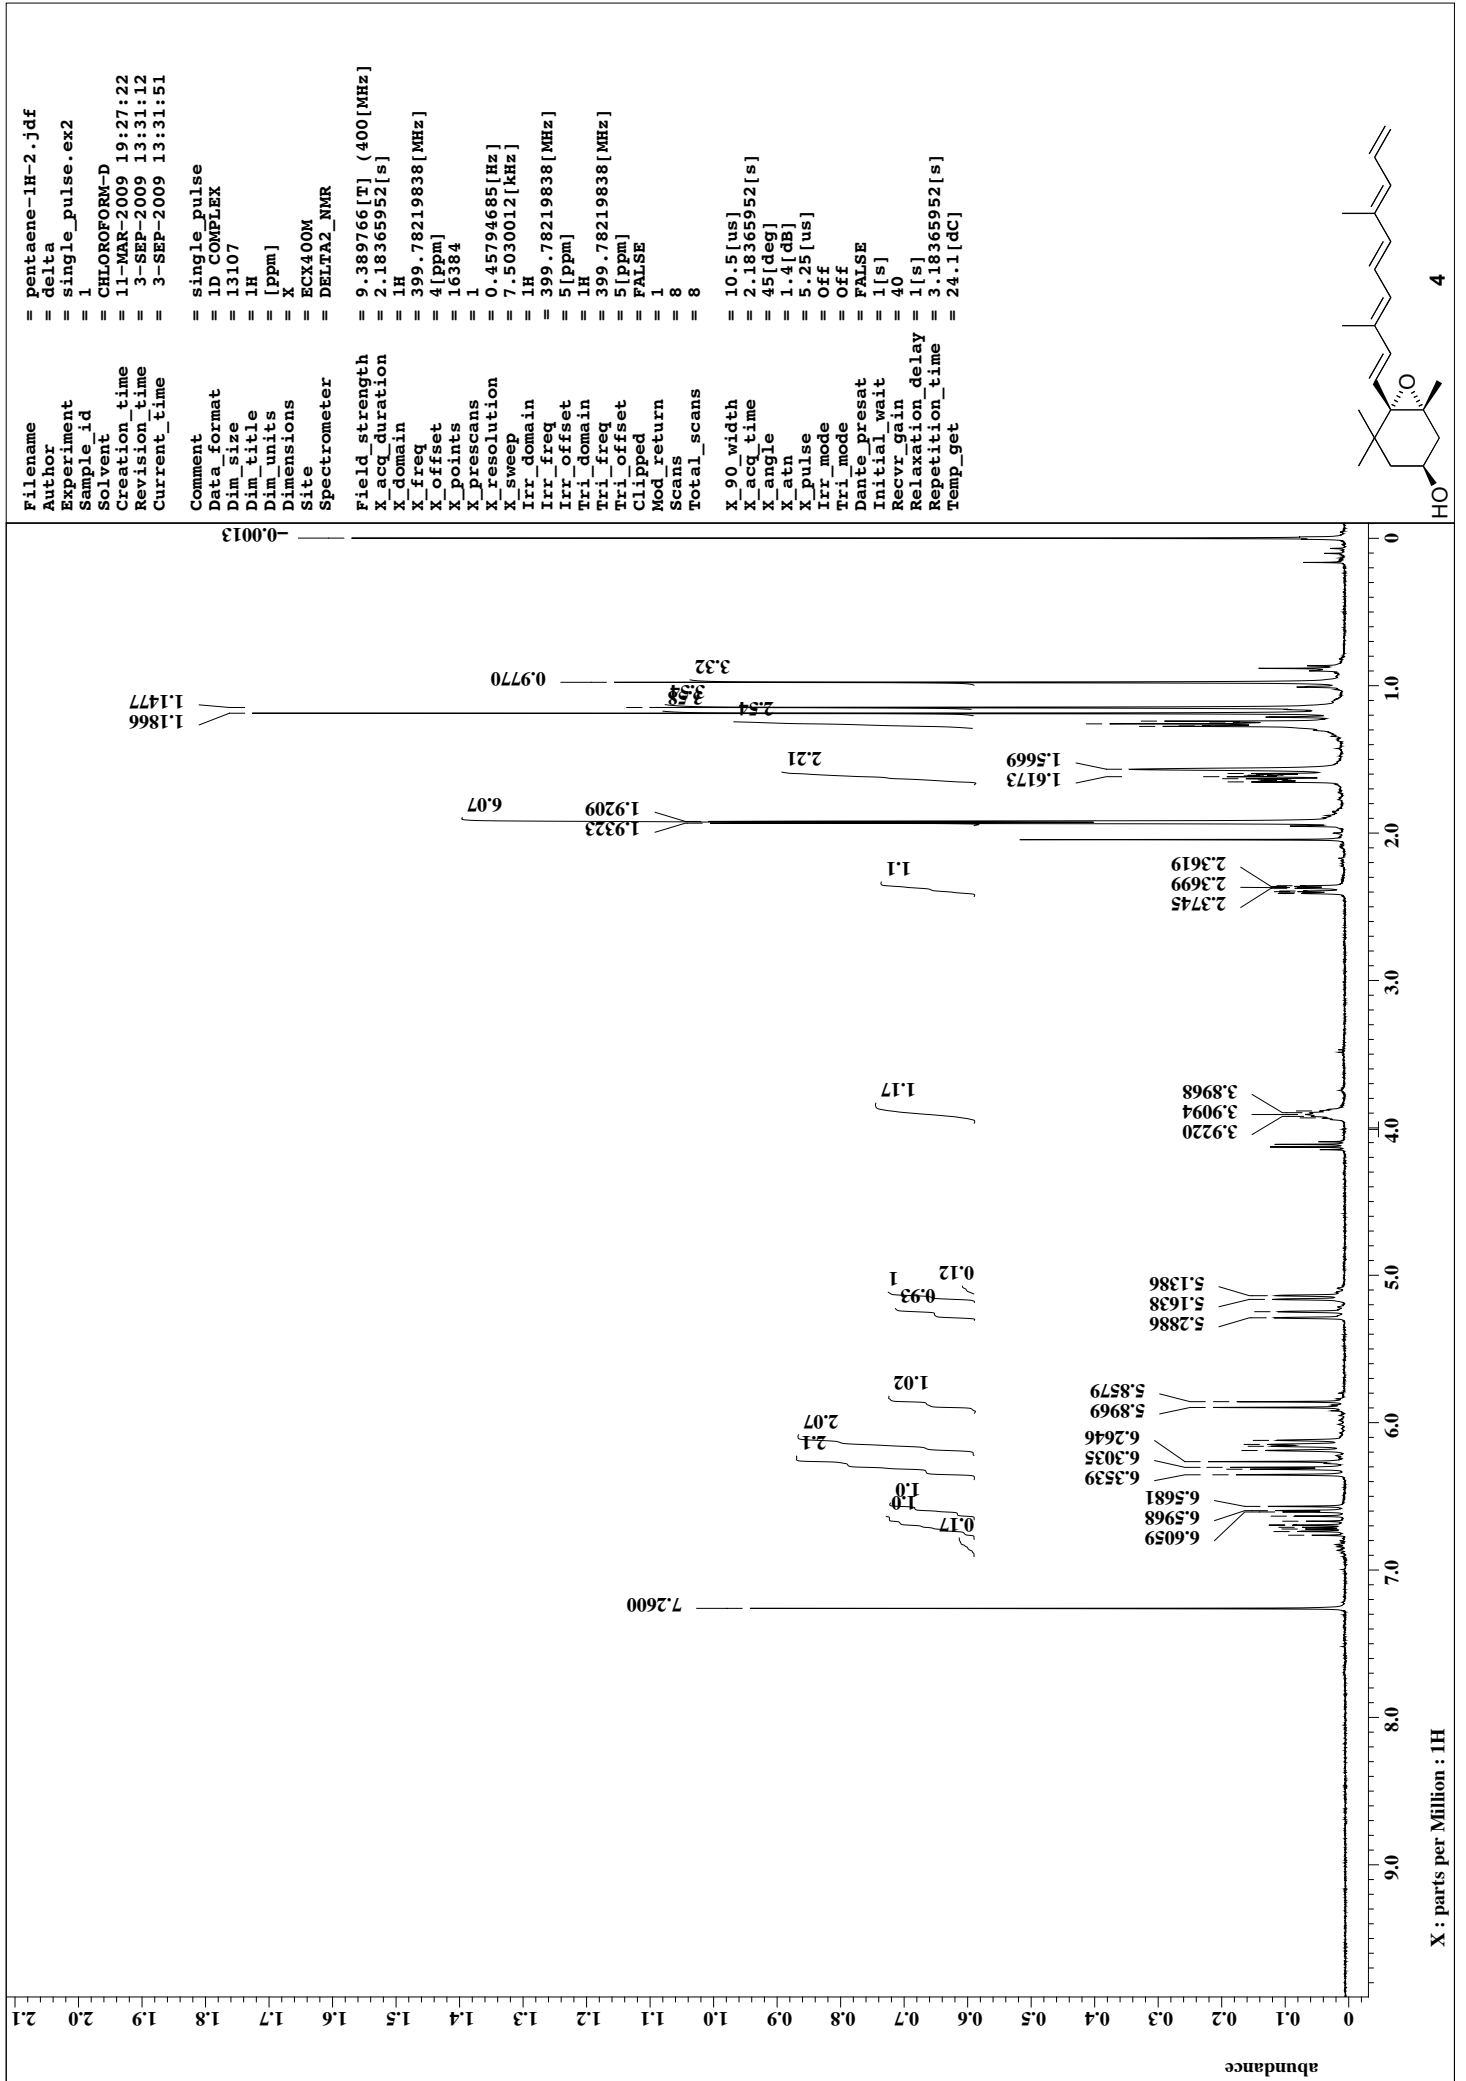

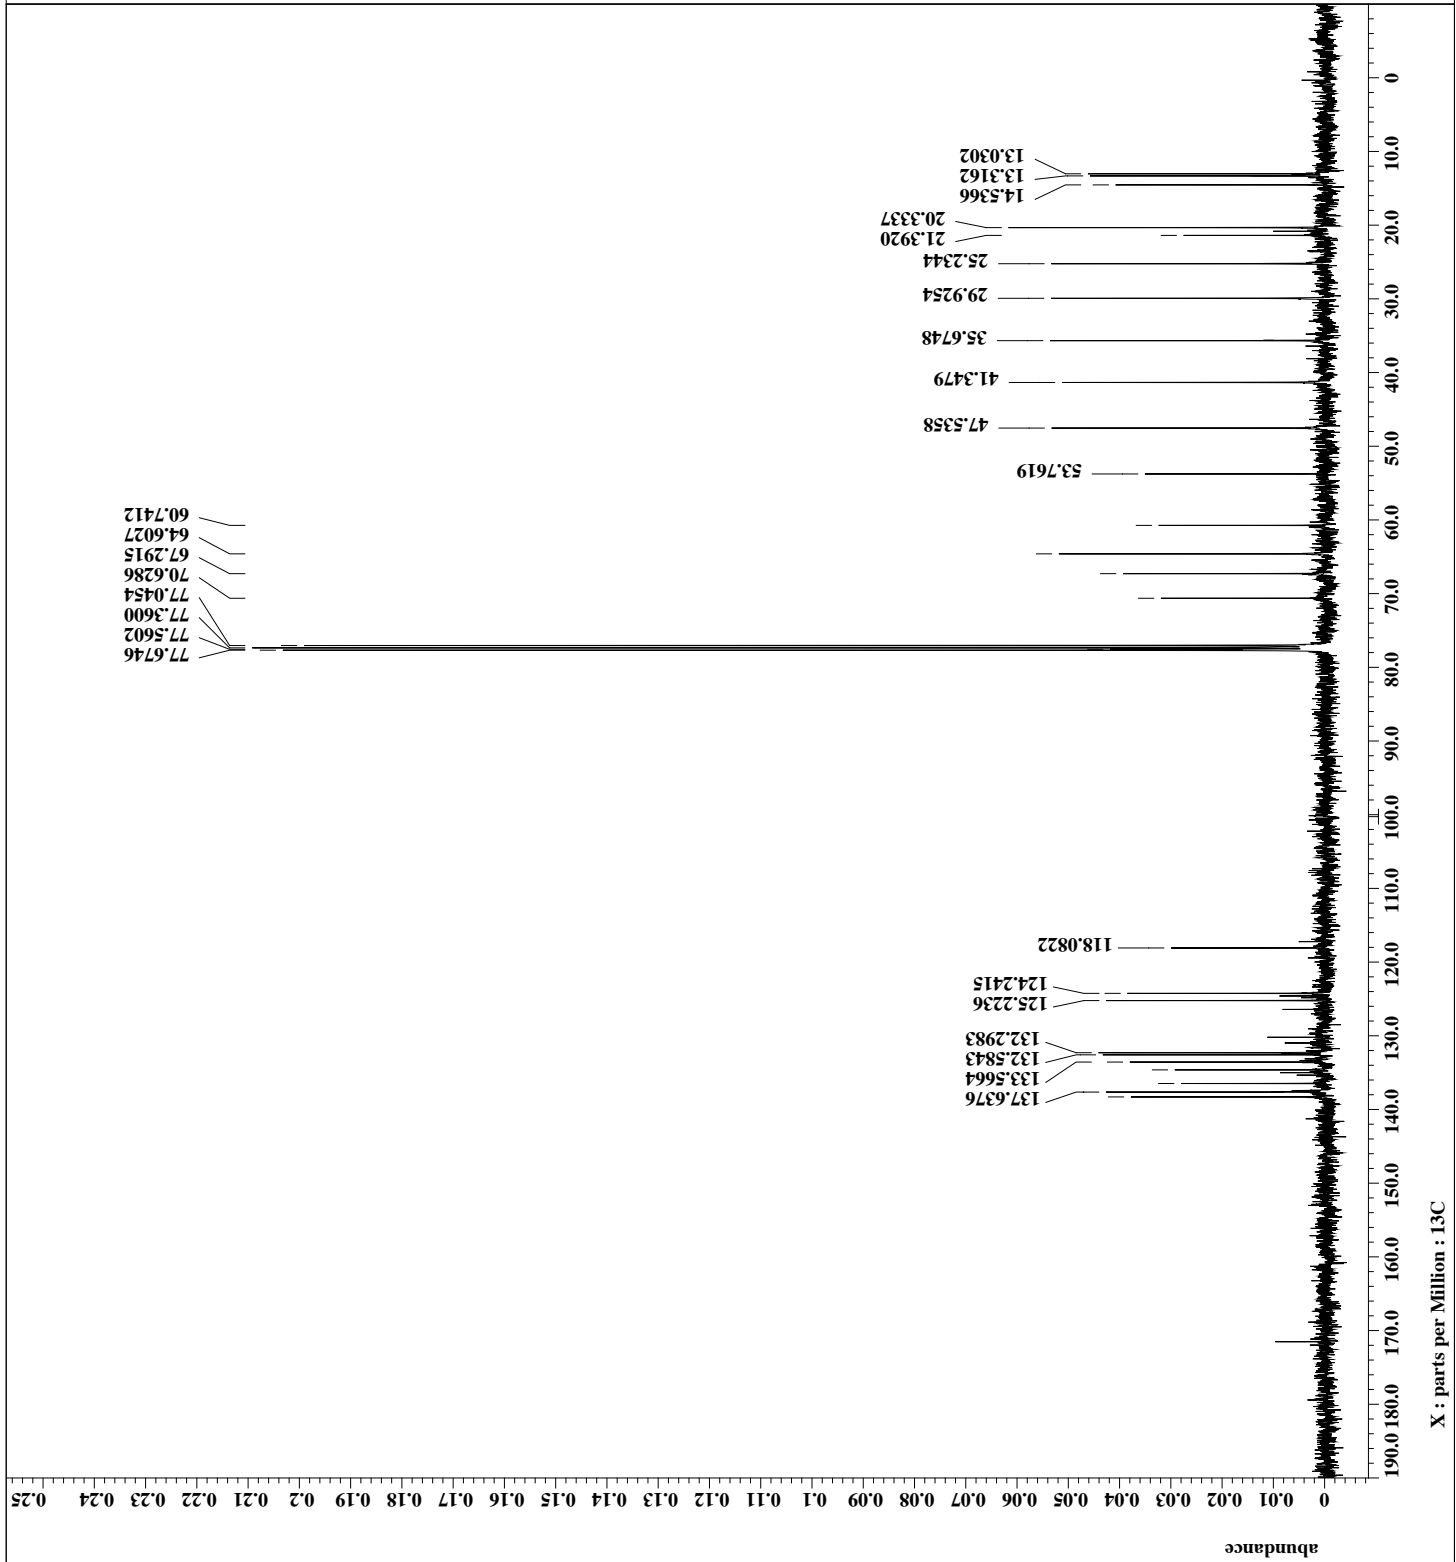

```

File name      = pentaene-13C-2.jdf
Author        = delta
Experiment    = single_pulse_dec
Sample ID     = S#675968
Solvent       = CHLOROFORM-D
Creation time  = 6-FEB-2009 18:28:28
Revision time  = 3-SEP-2009 13:54:31
Current time   = 3-SEP-2009 13:54:53

Comment       = single pulse decouple
Data format   = ID COMPLEX
Dim Size     = 26214
Dim Title    = 13C
Dim Units    = [ppm]
Dimensions    = X
Site         = ECX400M
Spectrometer = DELTA2_NMR

Field strength = 9.389766[T] (400[MHz])
X_acq_duration = 1.04333312[s]
X_domain       = 13C
X_freq        = 100.52530333[MHz]
X_offset      = 100[ppm]
X_points      = 32768
X_prescans    = 4
X_resolution   = 0.95846665[Hz]
X_sweep       = 31.40703518[kHz]
Irr_domain    = 1H
Irr_freq      = 399.78219838[MHz]
Irr_offset    = 5[ppm]
Clipped       = FALSE
Mod_return    = 1
Scans         = 316
Total_scans   = 316

X_90_width    = 8.4[us]
X_acq_time    = 1.04333312[s]
X_angle       = 45[deg]
X_atn         = 6.6[db]
X_pulse       = 4.2[us]
Irr_atn_dec   = 22.2[db]
Irr_atn_noe   = 22.2[db]
Irr_noise     = WAITZ
Decoupling    = TRUE
Initial_wait  = 1[s]
Noe           = TRUE
Noe_time      = 5[s]
Recvr_gain    = 50
Relaxation_delay = 5[s]
Repetition_time = 6.04333312[s]
Temp_get      = 24.8[dc]
    
```

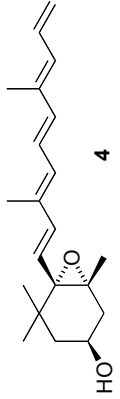



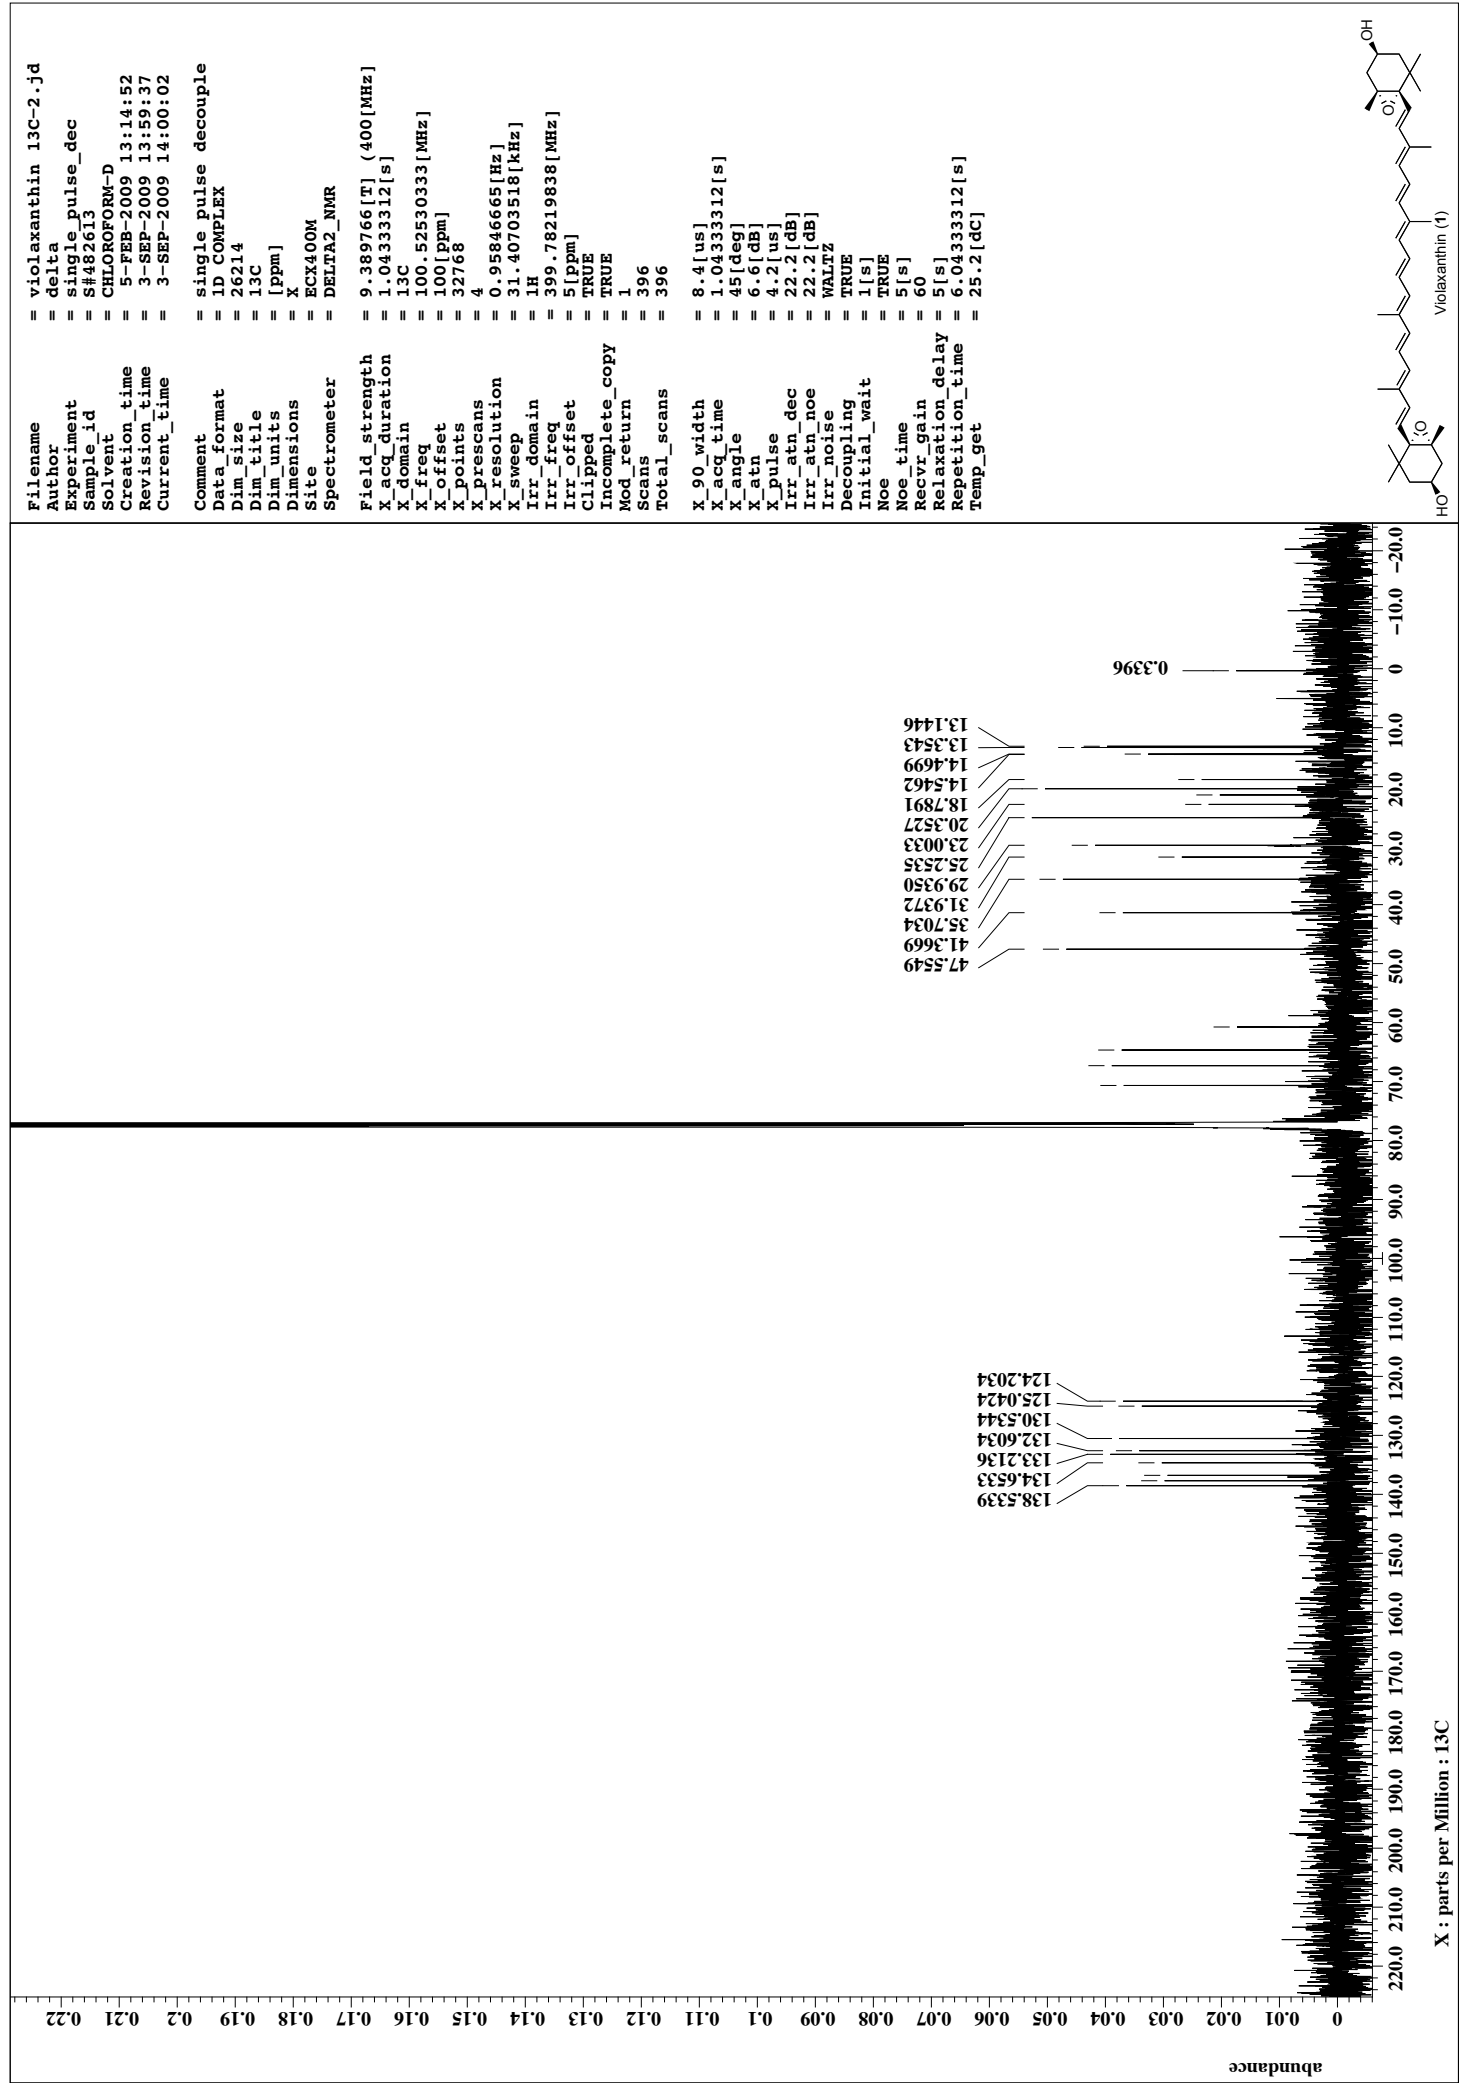

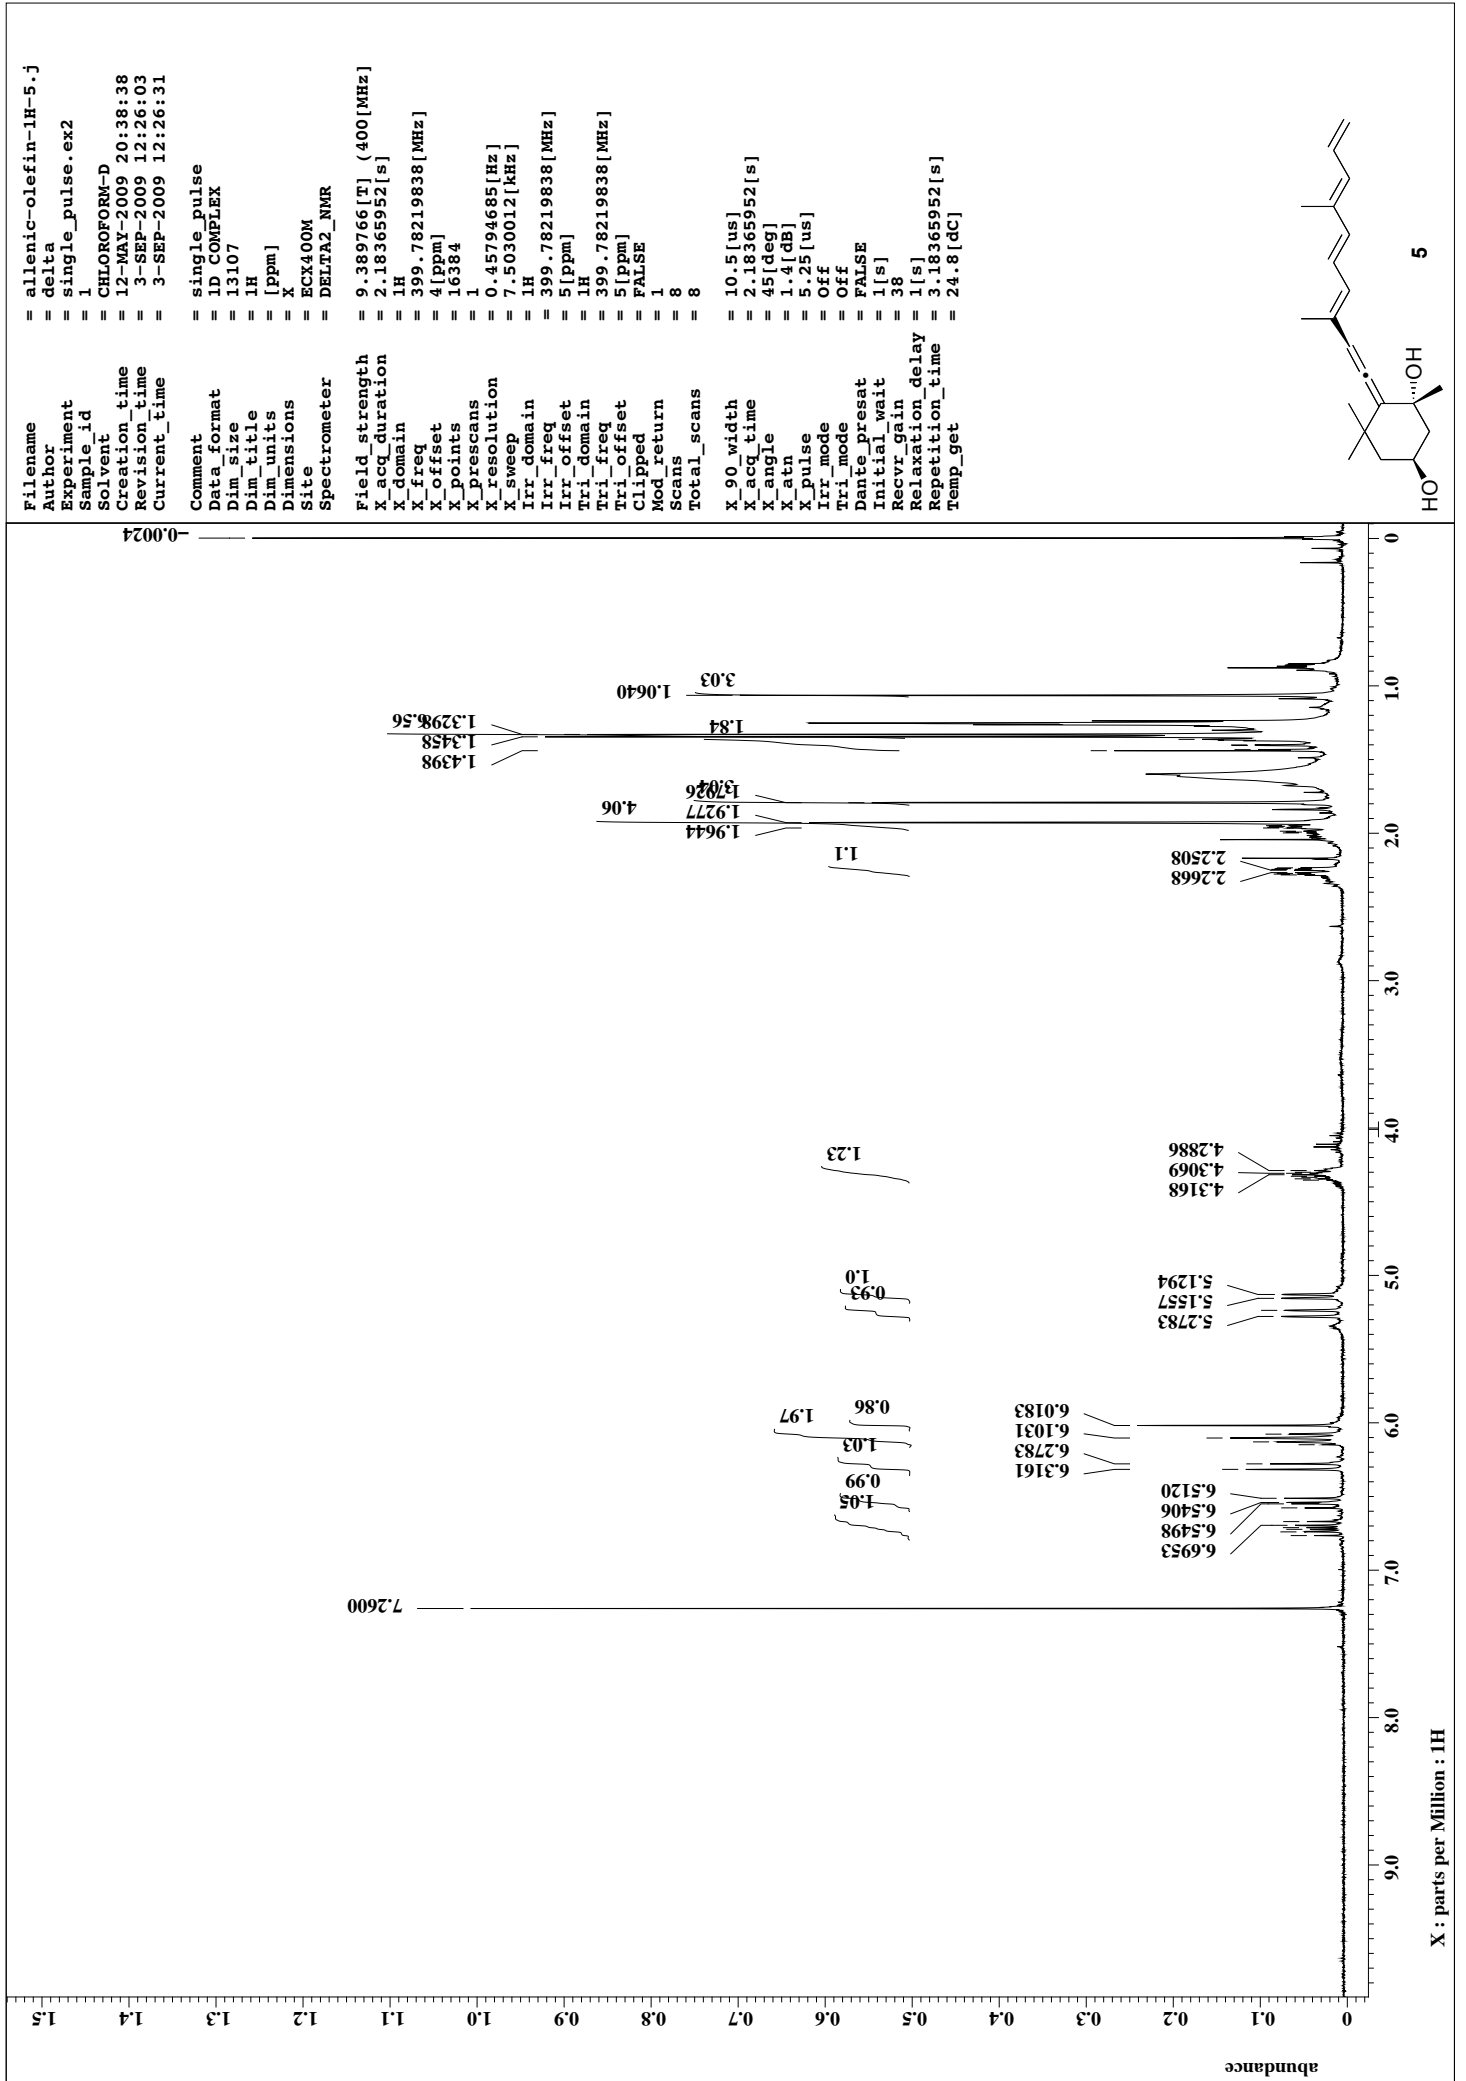

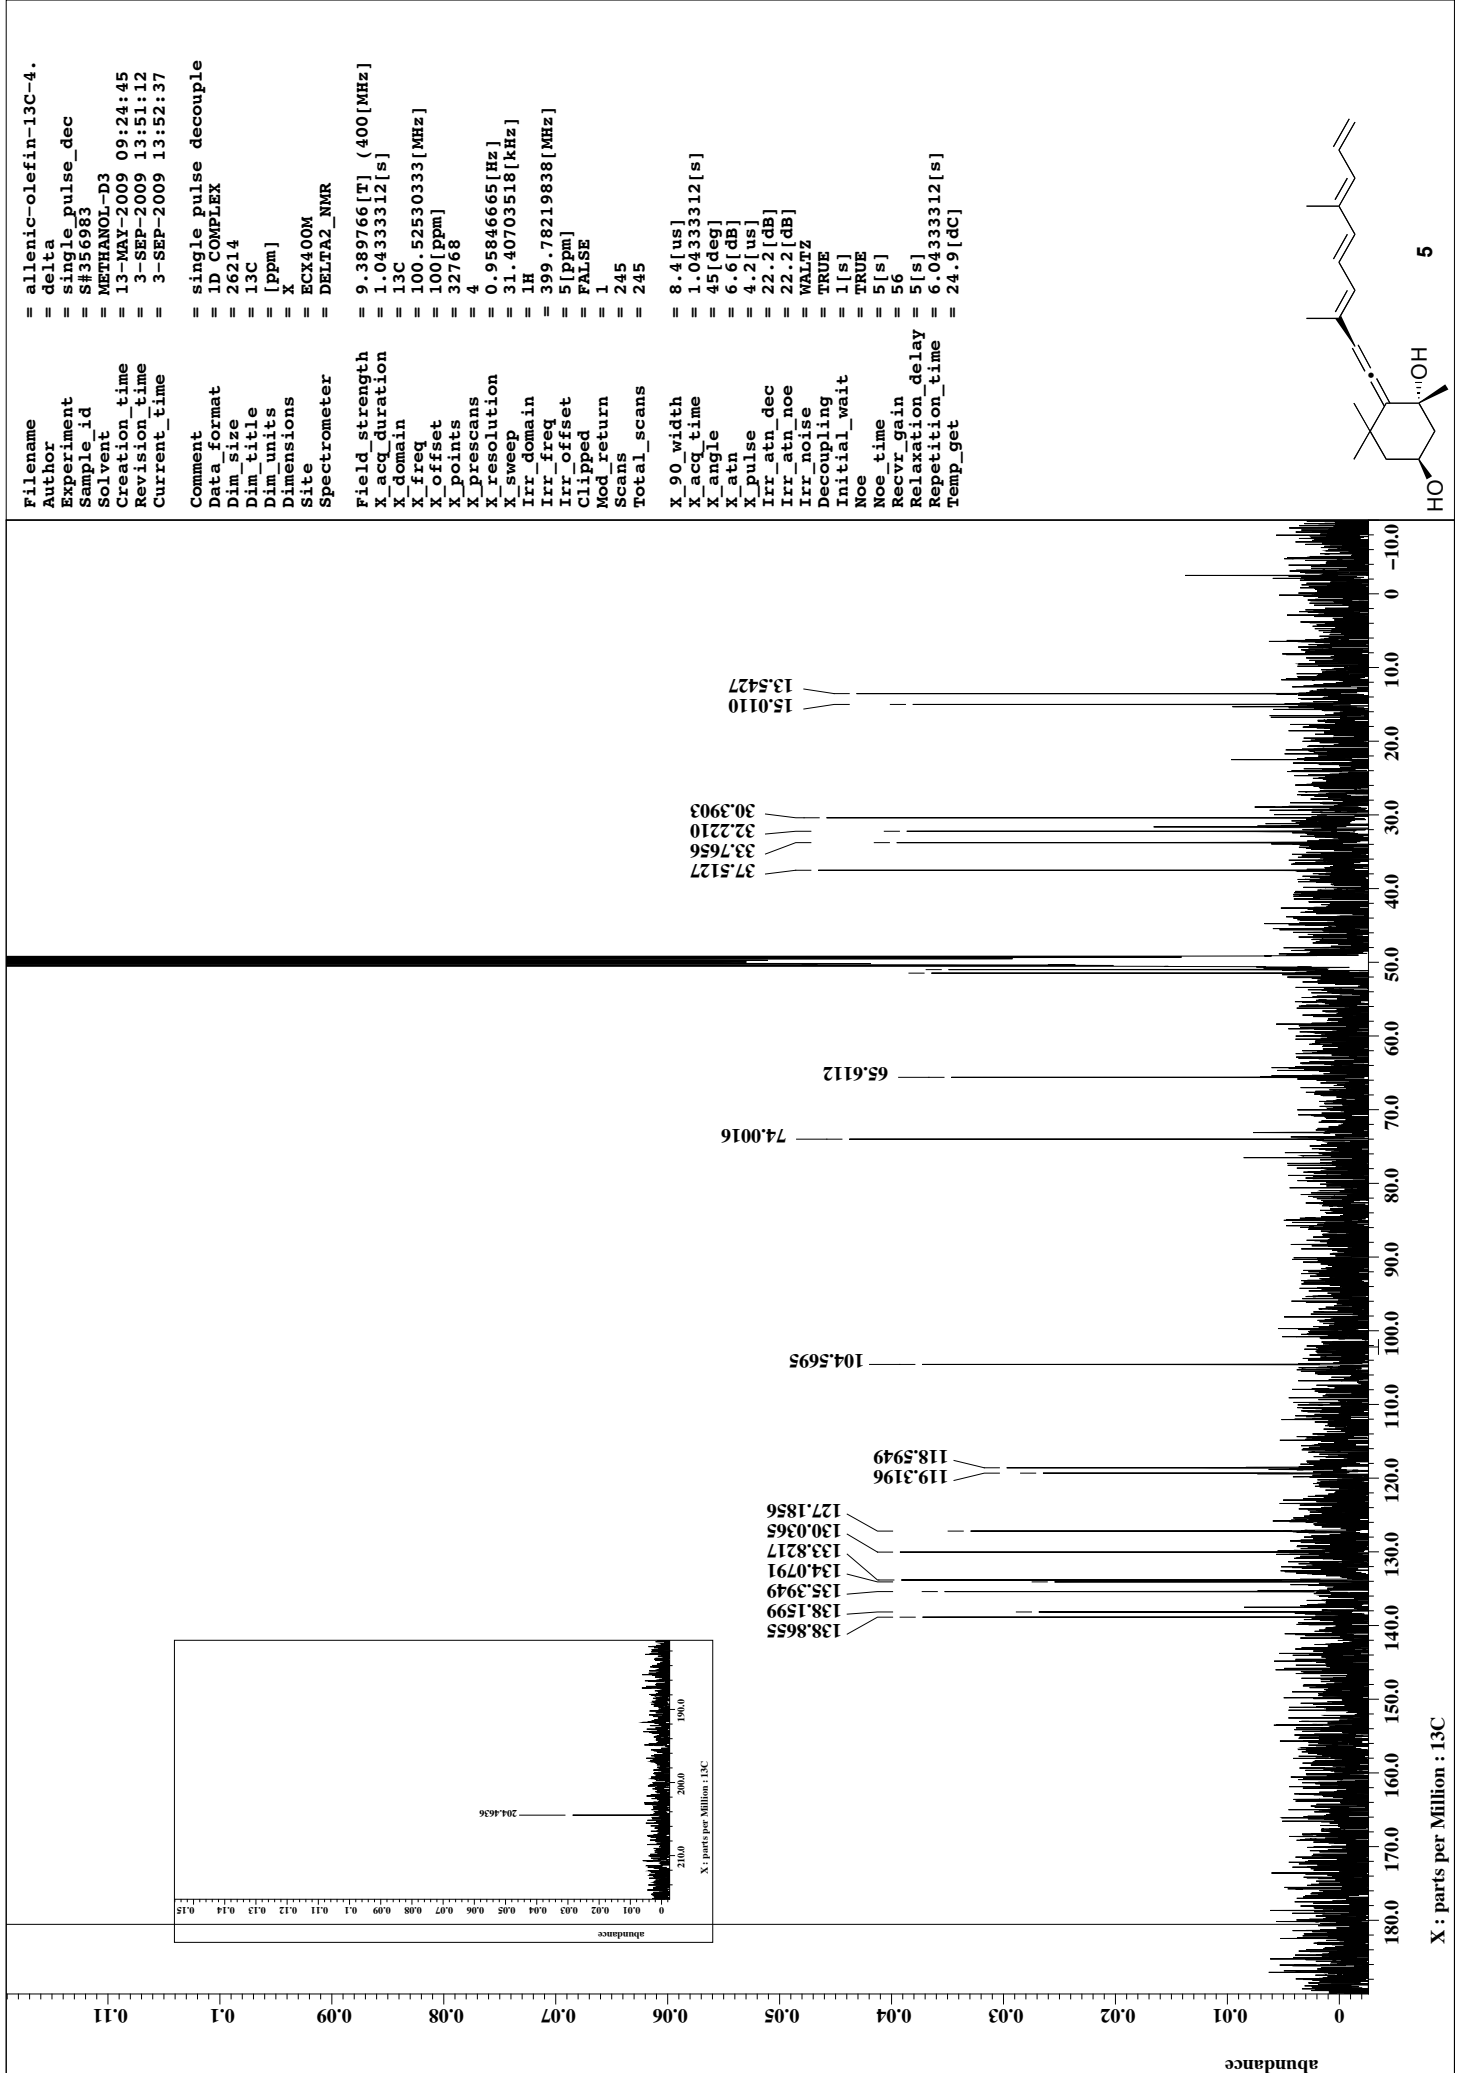

```

File name      = allenic-olefin-13C-4.
Author        = delta
Experiment    = single_pulse_dec
Sample ID     = S#356983
Solvent       = METHANOL-D3
Creation time = 13-WAY-2009 09:24:45
Revision time = 3-SEP-2009 13:51:12
Current time  = 3-SEP-2009 13:52:37

Comment       = single pulse decouple
Data format   = ID COMPLEX
Dim Size      = 26214
Dim Title     = 13C
Dim Units     = [ppm]
Dimensions    = X
Site          = ECX400M
Spectrometer  = DELTA2_NMR

Field strength = 9.389766[T] (400[MHz])
X_acq_duration = 1.04333312[s]
X_domain       = 13C
X_freq         = 100.52530333[MHz]
X_offset       = 100[ppm]
X_points       = 32768
X_prescans     = 4
X_resolution   = 0.95846665[Hz]
X_sweep        = 31.40703518[kHz]
Irr_domain     = 1H
Irr_freq       = 399.78219838[MHz]
Irr_offset     = 5[ppm]
Clipped        = FALSE
Mod_return     = 1
Scans          = 245
Total_scans    = 245

X_90_width     = 8.4[us]
X_acq_time     = 1.04333312[s]
X_angle        = 45[deg]
X_atn          = 6.6[db]
X_pulse        = 4.2[us]
Irr_atn_dec    = 22.2[db]
Irr_atn_noe    = 22.2[db]
Irr_noise      = WAITZ
Decoupling     = TRUE
Initial_wait   = 1[s]
Noe            = TRUE
Noe_time       = 5[s]
Recvr_gain     = 56
Relaxation_delay = 5[s]
Repetition_time = 6.04333312[s]
Temp_get       = 24.9[dc]
  
```

X : parts per Million : 13C

5



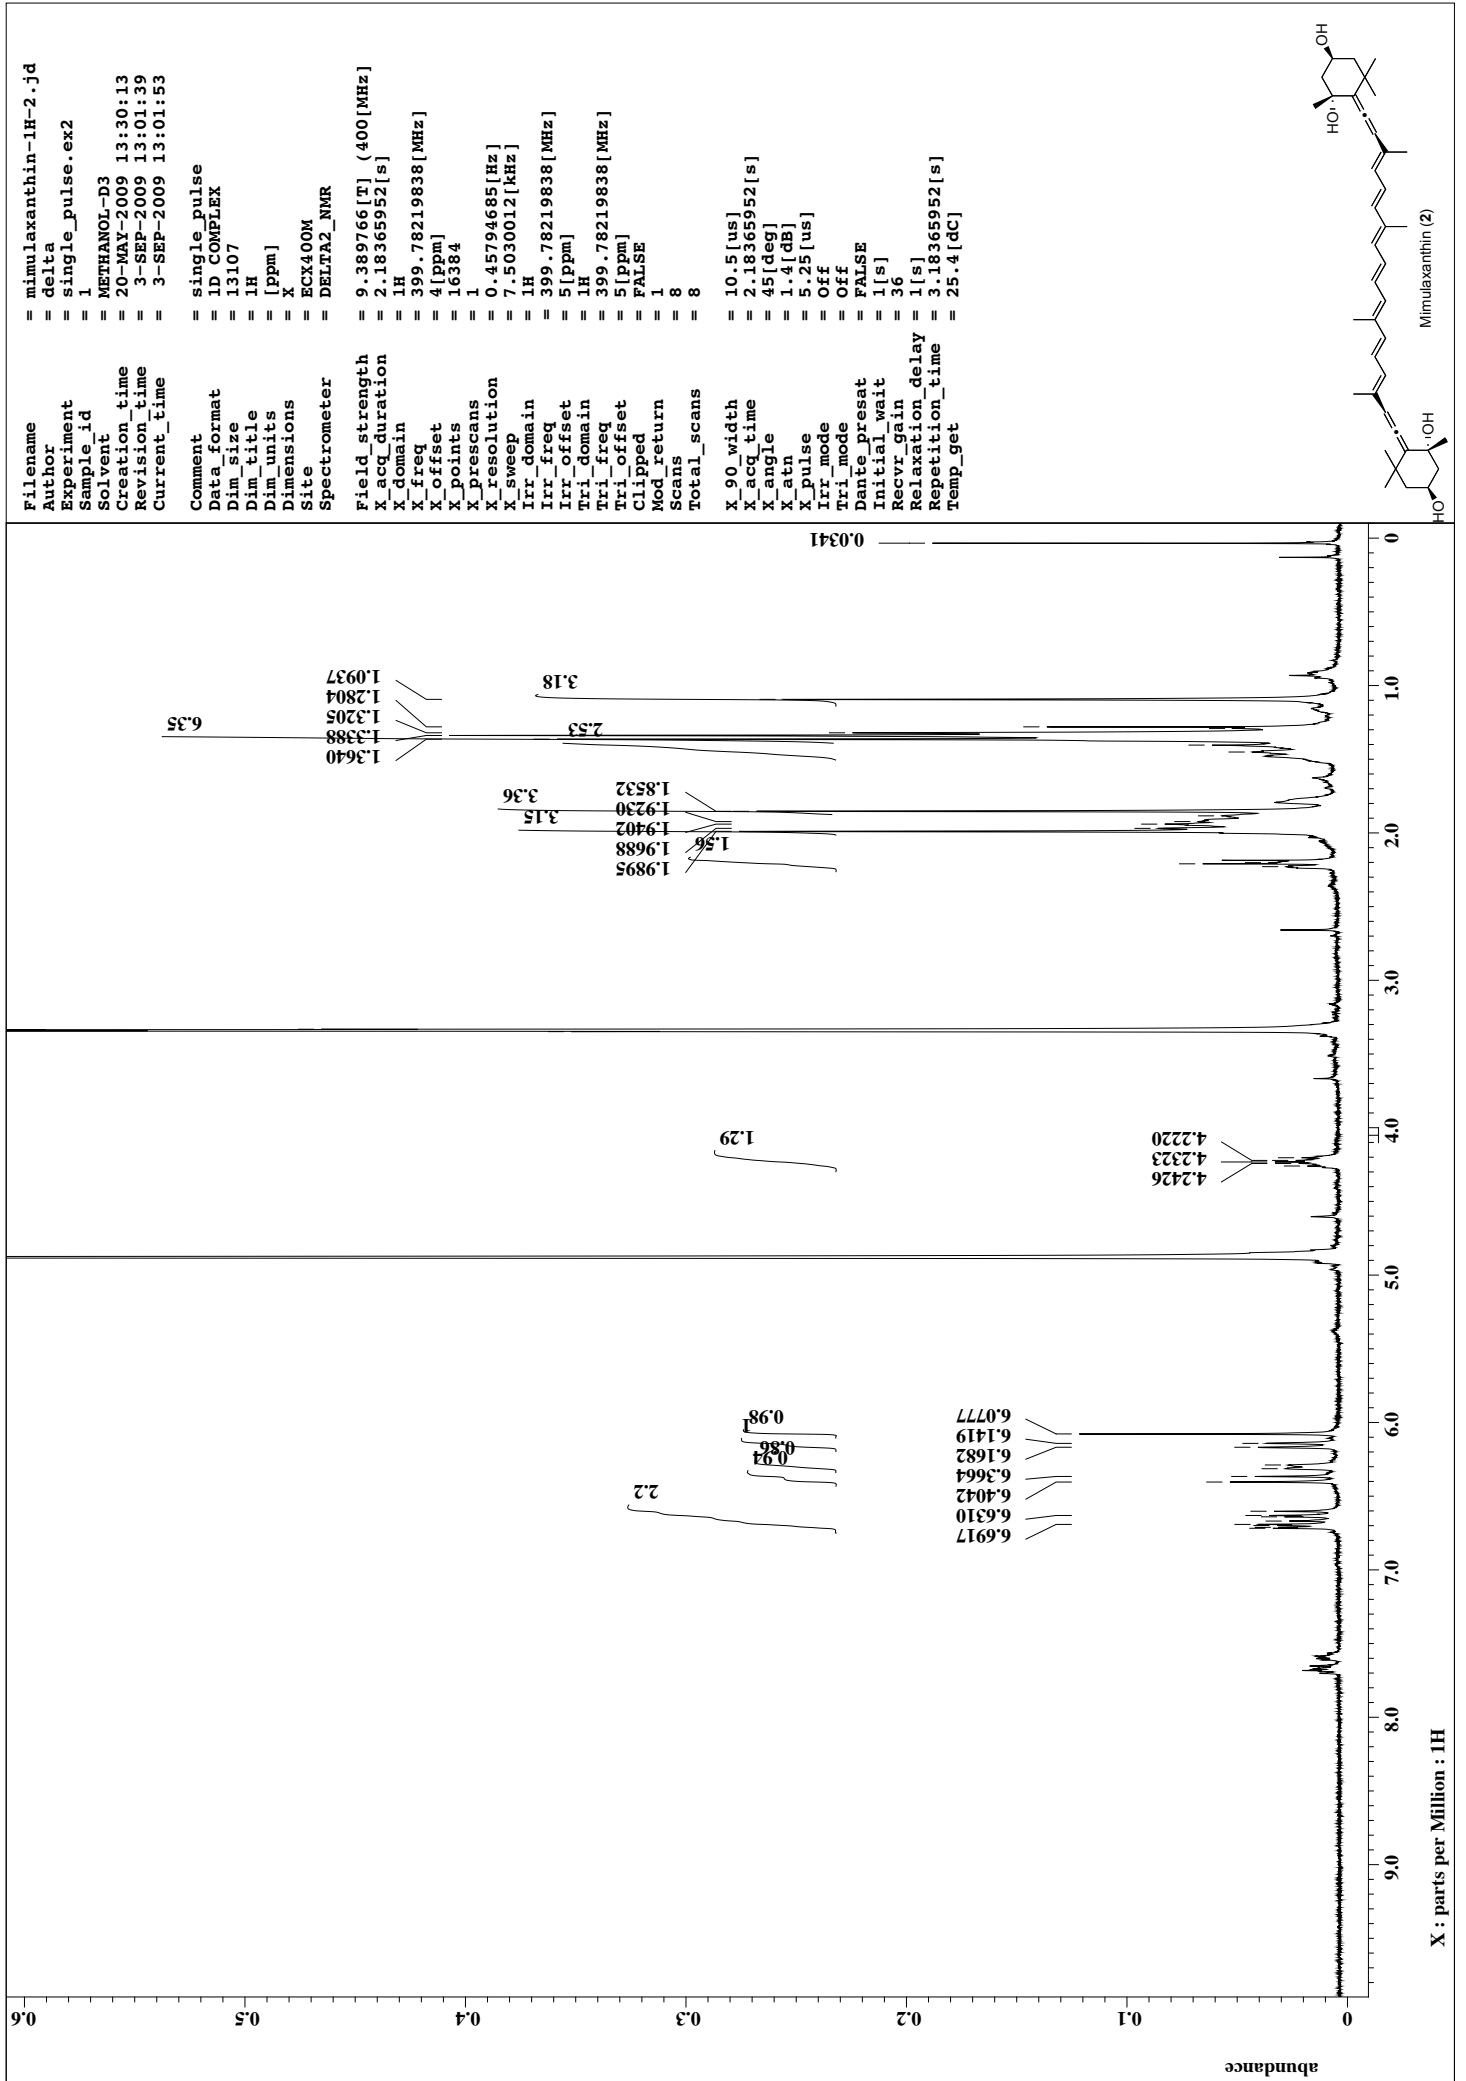

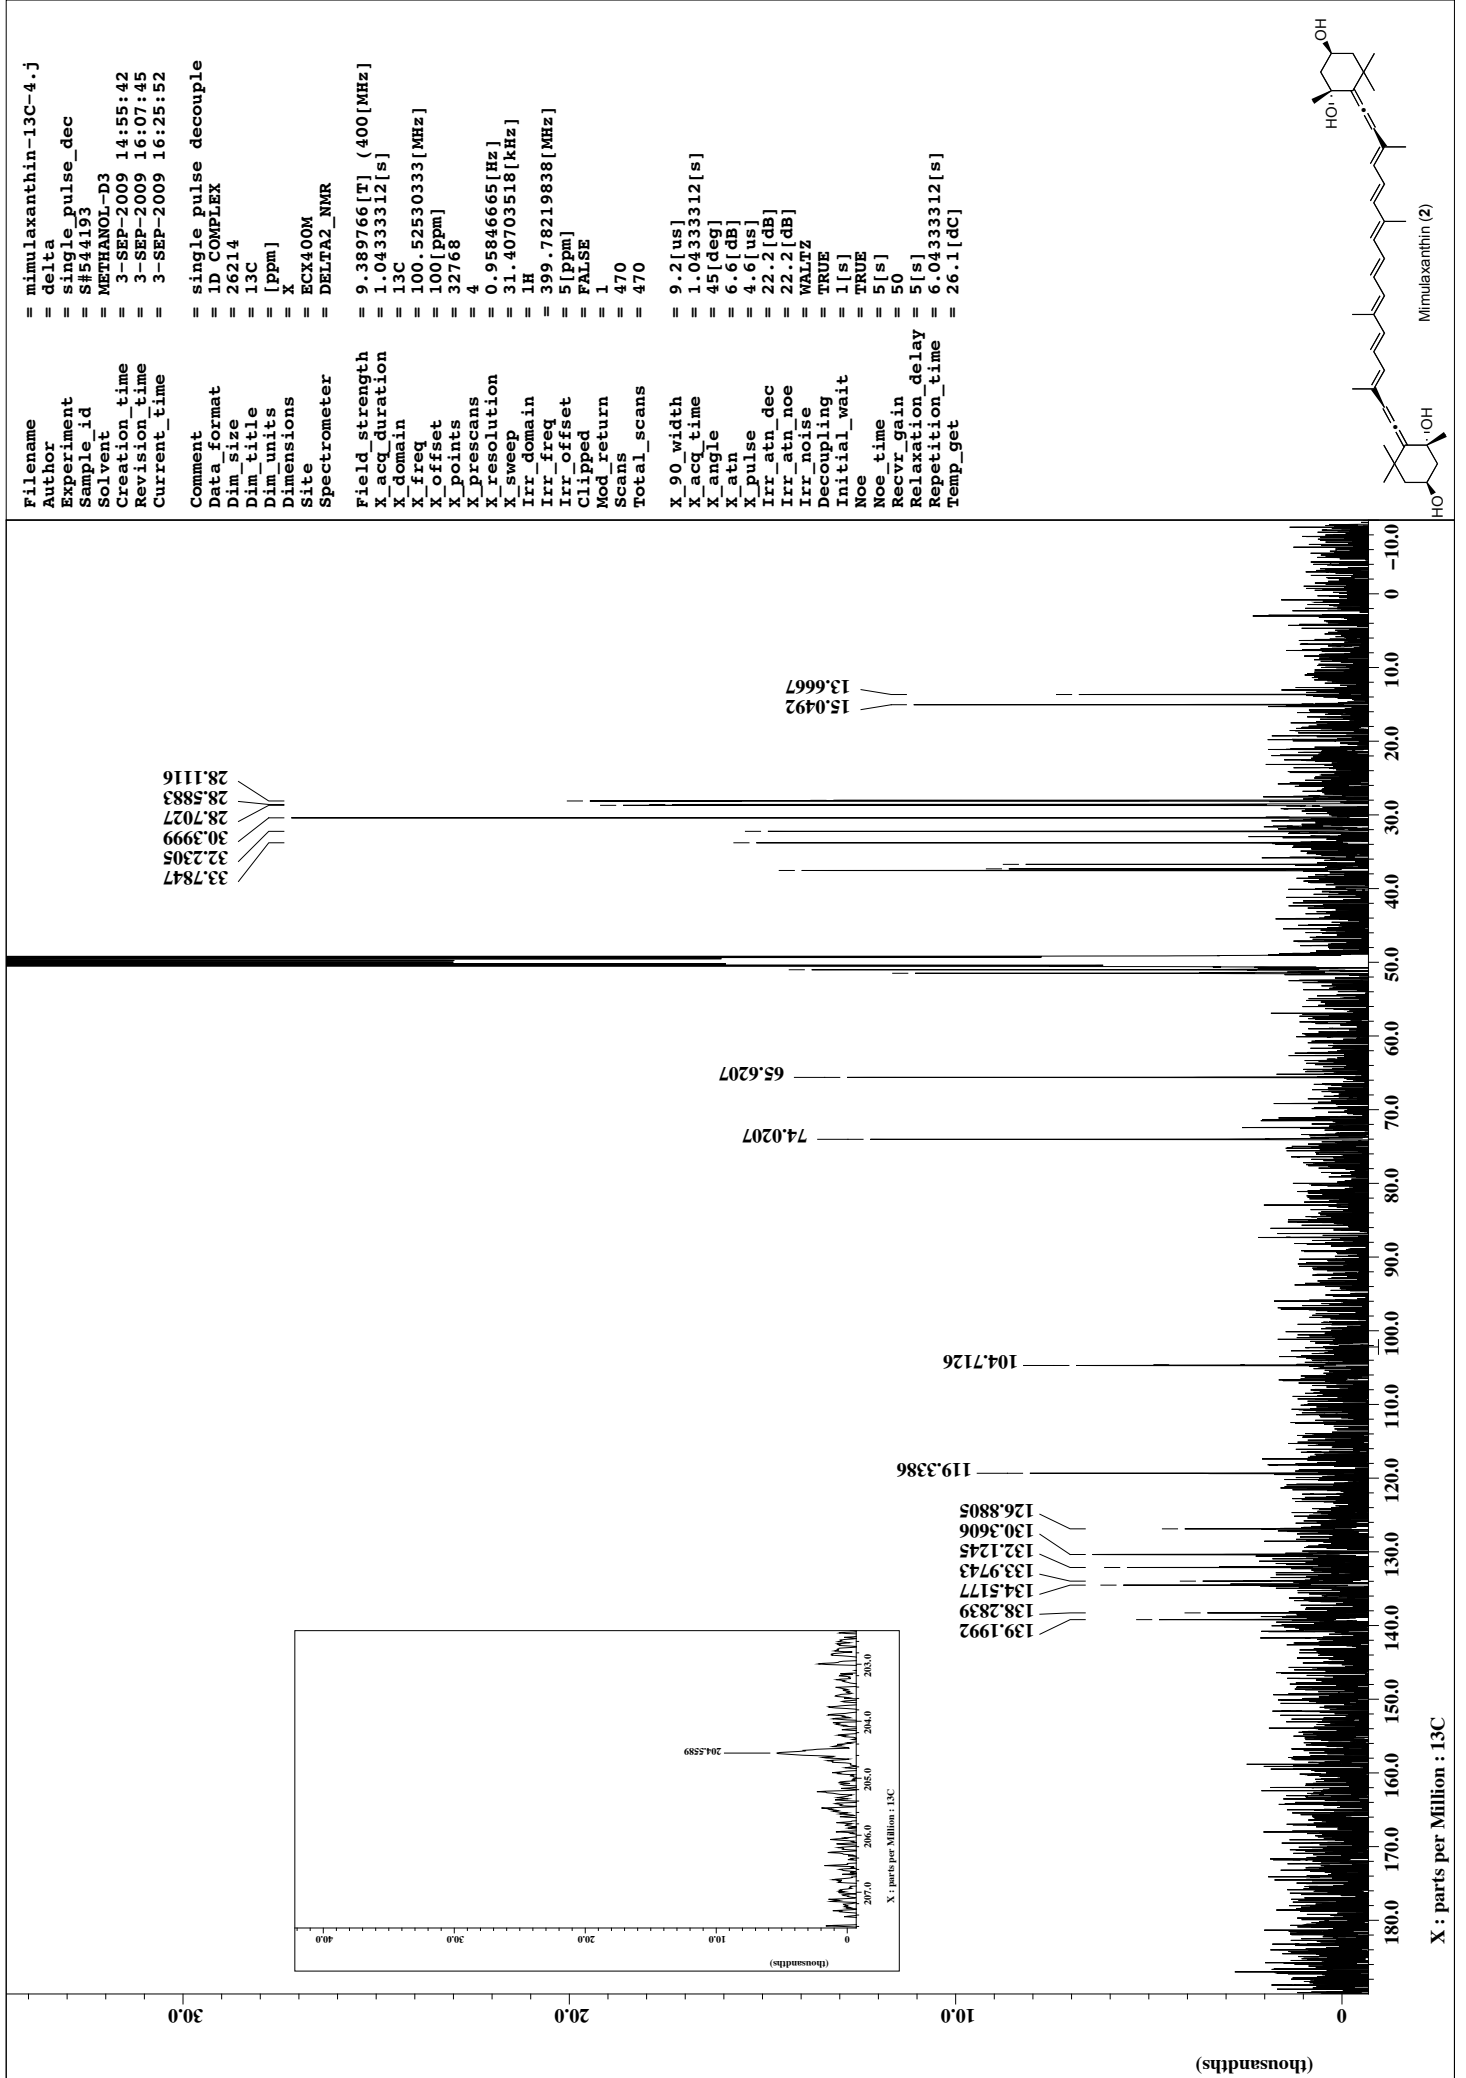

X : parts per Million : 13C
